# Supplementary material for: Detecting pan-cancer conserved microRNA modules from microRNA expression profiles across multiple cancers
Source: Royal Society of Chemistry journal article supplement (doi:10.1039/c5mb00257e), 2015-06-01
Supplement: c5mb00257e2.xlsx [file c5mb00257e2.xlsx]

## Sheet: Sheet1
Cancer name	MicroRNA name	Fold change
blca	hsa-mir-1296	3.49674
blca	hsa-mir-26b	2.19068
blca	hsa-mir-361	2.325
blca	hsa-mir-374b	1.82372
brca	hsa-mir-190b	10.007
brca	hsa-mir-194-2	1.51515
brca	hsa-mir-3127	2.66735
brca	hsa-mir-615	3.00946
kirc	hsa-mir-122	90.9978
kirc	hsa-mir-1251	-2.16826
kirc	hsa-mir-1270-1	5.59022
kirc	hsa-mir-1270-2	5.71361
kirc	hsa-mir-135a-1	-2.17989
kirc	hsa-mir-146a	1.94731
kirc	hsa-mir-150	1.78222
kirc	hsa-mir-215	1.88323
kirc	hsa-mir-363	-1.76872
kirc	hsa-mir-514-1	-3.48809
kirc	hsa-mir-514-2	-3.47473
kirc	hsa-mir-514-3	-3.4909
kirc	hsa-mir-592	7.41972
kirc	hsa-mir-653	2.33789
kirc	hsa-mir-885	13.5084
hnsc	hsa-mir-127	-1.93229
hnsc	hsa-mir-1293	7.0092
hnsc	hsa-mir-133a-2	-5.12374
hnsc	hsa-mir-206	-2.57084
hnsc	hsa-mir-369	-2.26346
hnsc	hsa-mir-410	-2.814
hnsc	hsa-mir-411	-3.58379
hnsc	hsa-mir-432	-1.76333
hnsc	hsa-mir-654	-2.37263
hnsc	hsa-mir-889	-1.69975
lusc	hsa-mir-1269	129.56
lusc	hsa-mir-296	4.82351
lusc	hsa-mir-30d	-3.90365
lusc	hsa-mir-34b	-1.97936
lusc	hsa-mir-34c	-3.00677
lusc	hsa-mir-3615	1.84798
lusc	hsa-mir-3647	3.1841
lusc	hsa-mir-511-1	-2.24813
lusc	hsa-mir-511-2	-2.28677
ucec	hsa-mir-188	2.73851
ucec	hsa-mir-19b-1	2.18375
ucec	hsa-mir-202	-427.385
ucec	hsa-mir-23b	-1.50049
ucec	hsa-mir-3200	17.3327
ucec	hsa-mir-500b	1.94703
luad	hsa-mir-153-2	35.2917
luad	hsa-mir-184	-4.73523
luad	hsa-mir-212	2.42761
luad	hsa-mir-3130-1	1.89462
luad	hsa-mir-328	-6.43811
luad	hsa-mir-3676	-2.25867
luad	hsa-mir-574	-2.0866
luad	hsa-mir-598	-1.60054
