# Supplementary material for: Detecting pan-cancer conserved microRNA modules from microRNA expression profiles across multiple cancers
Source: Royal Society of Chemistry journal article supplement (doi:10.1039/c5mb00257e), 2015-06-01
Supplement: c5mb00257e3.xlsx [file c5mb00257e3.xlsx]

## Sheet: Sheet6
microRNA	module numbers
hsa-mir-590	151
hsa-mir-19a	111
hsa-mir-93	85
hsa-mir-200c	84
hsa-mir-130b	73
hsa-mir-21	64
hsa-mir-191	58
hsa-mir-629	56
hsa-mir-96	50
hsa-mir-183	47
hsa-mir-15b	45
hsa-mir-142	39
hsa-mir-210	39
hsa-mir-143	38
hsa-mir-1307	31
hsa-mir-671	29
hsa-mir-331	25
hsa-mir-139	24
hsa-mir-182	24
hsa-mir-106b	22
hsa-mir-15a	20
hsa-mir-17	20
hsa-mir-7-1	17
hsa-mir-141	16
hsa-mir-18a	15
hsa-mir-148a	14
hsa-let-7c	13
hsa-mir-301a	13
hsa-mir-324	10
hsa-mir-450b	10
hsa-mir-744	10
hsa-mir-345	8
hsa-mir-181b-1	6
hsa-mir-484	6
hsa-mir-425	5
hsa-mir-128-1	4
hsa-mir-128-2	4
hsa-mir-145	4
hsa-mir-25	4
hsa-mir-330	4
hsa-mir-625	4
hsa-mir-135b	3
hsa-mir-200b	3
hsa-mir-708	3
hsa-mir-769	3
hsa-mir-140	2
hsa-mir-195	2
hsa-mir-200a	2
hsa-mir-224	2
hsa-mir-342	2
hsa-mir-429	2
hsa-mir-151	1
hsa-mir-99a	1
