# Supplementary material for: Detecting pan-cancer conserved microRNA modules from microRNA expression profiles across multiple cancers
Source: Royal Society of Chemistry journal article supplement (doi:10.1039/c5mb00257e), 2015-06-01
Supplement: c5mb00257e4.xlsx [file c5mb00257e4.xlsx]

## Sheet: Sheet1
MODEULE MEMBER										T	C
hsa-mir-1307	hsa-mir-139	hsa-mir-15b	hsa-mir-200c	hsa-mir-21	hsa-mir-324	hsa-mir-671	hsa-mir-744			1	0.496044
hsa-mir-1307	hsa-mir-142	hsa-mir-15b	hsa-mir-200c	hsa-mir-21	hsa-mir-671	hsa-mir-744				1	0.472113
hsa-mir-106b	hsa-mir-130b	hsa-mir-17	hsa-mir-18a	hsa-mir-19a	hsa-mir-590	hsa-mir-93				1	0.469369
hsa-mir-1307	hsa-mir-143	hsa-mir-15b	hsa-mir-191	hsa-mir-200c	hsa-mir-21	hsa-mir-324	hsa-mir-331	hsa-mir-671	hsa-mir-744	2	0.464245
hsa-mir-130b	hsa-mir-135b	hsa-mir-17	hsa-mir-18a	hsa-mir-19a	hsa-mir-590	hsa-mir-96				1	0.431911
hsa-mir-15a	hsa-mir-15b	hsa-mir-21	hsa-mir-484							2	0.429231
hsa-mir-1307	hsa-mir-143	hsa-mir-15b	hsa-mir-191	hsa-mir-200c	hsa-mir-324	hsa-mir-331	hsa-mir-671	hsa-mir-744	hsa-mir-93	2	0.428393
hsa-mir-1307	hsa-mir-130b	hsa-mir-143	hsa-mir-15b	hsa-mir-191	hsa-mir-21	hsa-mir-324	hsa-mir-331	hsa-mir-671	hsa-mir-744	1	0.428074
hsa-mir-15a	hsa-mir-17	hsa-mir-18a	hsa-mir-19a	hsa-mir-590	hsa-mir-629	hsa-mir-93	hsa-mir-96			1	0.424285
hsa-mir-130b	hsa-mir-17	hsa-mir-18a	hsa-mir-19a	hsa-mir-590	hsa-mir-629	hsa-mir-93	hsa-mir-96			1	0.413794
hsa-mir-1307	hsa-mir-139	hsa-mir-15b	hsa-mir-200c	hsa-mir-21	hsa-mir-590	hsa-mir-671				2	0.411468
hsa-mir-1307	hsa-mir-142	hsa-mir-15b	hsa-mir-200c	hsa-mir-21	hsa-mir-590	hsa-mir-671				1	0.410515
hsa-mir-17	hsa-mir-18a	hsa-mir-19a	hsa-mir-210	hsa-mir-590	hsa-mir-629	hsa-mir-93				1	0.408028
hsa-mir-15a	hsa-mir-17	hsa-mir-18a	hsa-mir-19a	hsa-mir-210	hsa-mir-590	hsa-mir-629	hsa-mir-93			1	0.406857
hsa-mir-1307	hsa-mir-130b	hsa-mir-143	hsa-mir-15b	hsa-mir-191	hsa-mir-324	hsa-mir-331	hsa-mir-671	hsa-mir-744	hsa-mir-93	1	0.405903
hsa-mir-1307	hsa-mir-143	hsa-mir-183	hsa-mir-191	hsa-mir-200c	hsa-mir-21	hsa-mir-324	hsa-mir-331	hsa-mir-671	hsa-mir-744	2	0.403984
hsa-mir-130b	hsa-mir-17	hsa-mir-18a	hsa-mir-19a	hsa-mir-345	hsa-mir-590	hsa-mir-7-1	hsa-mir-93	hsa-mir-96		2	0.402333
hsa-mir-1307	hsa-mir-15b	hsa-mir-191	hsa-mir-200c	hsa-mir-21	hsa-mir-331	hsa-mir-590	hsa-mir-671			1	0.400307
hsa-mir-106b	hsa-mir-130b	hsa-mir-19a	hsa-mir-590	hsa-mir-93						6	0.399628
hsa-mir-130b	hsa-mir-17	hsa-mir-18a	hsa-mir-19a	hsa-mir-210	hsa-mir-590	hsa-mir-629	hsa-mir-93			1	0.394973
hsa-mir-140	hsa-mir-182	hsa-mir-183	hsa-mir-191	hsa-mir-96						2	0.39115
hsa-mir-130b	hsa-mir-17	hsa-mir-18a	hsa-mir-19a	hsa-mir-590	hsa-mir-629	hsa-mir-7-1	hsa-mir-93	hsa-mir-96		1	0.388355
hsa-mir-139	hsa-mir-140	hsa-mir-182	hsa-mir-96							2	0.380922
hsa-mir-130b	hsa-mir-18a	hsa-mir-324	hsa-mir-331	hsa-mir-93						2	0.380784
hsa-mir-130b	hsa-mir-15b	hsa-mir-21	hsa-mir-484							2	0.380755
hsa-mir-1307	hsa-mir-143	hsa-mir-183	hsa-mir-191	hsa-mir-200c	hsa-mir-324	hsa-mir-331	hsa-mir-671	hsa-mir-744	hsa-mir-93	2	0.379529
hsa-mir-1307	hsa-mir-130b	hsa-mir-143	hsa-mir-183	hsa-mir-191	hsa-mir-21	hsa-mir-324	hsa-mir-331	hsa-mir-671	hsa-mir-744	2	0.378664
hsa-mir-130b	hsa-mir-19a	hsa-mir-590	hsa-mir-629	hsa-mir-93						4	0.378553
hsa-mir-130b	hsa-mir-17	hsa-mir-18a	hsa-mir-19a	hsa-mir-210	hsa-mir-345	hsa-mir-590	hsa-mir-7-1	hsa-mir-93		1	0.378471
hsa-mir-141	hsa-mir-148a	hsa-mir-17	hsa-mir-19a	hsa-mir-210	hsa-mir-301a	hsa-mir-590				1	0.378308
hsa-mir-130b	hsa-mir-18a	hsa-mir-19a	hsa-mir-425	hsa-mir-590	hsa-mir-93	hsa-mir-96				1	0.375826
hsa-mir-139	hsa-mir-141	hsa-mir-148a	hsa-mir-17	hsa-mir-19a	hsa-mir-200a	hsa-mir-301a	hsa-mir-429	hsa-mir-590	hsa-mir-96	1	0.372087
hsa-mir-182	hsa-mir-183	hsa-mir-191	hsa-mir-425	hsa-mir-590	hsa-mir-96					2	0.368322
hsa-mir-130b	hsa-mir-17	hsa-mir-18a	hsa-mir-19a	hsa-mir-210	hsa-mir-590	hsa-mir-629	hsa-mir-7-1	hsa-mir-93		1	0.367901
hsa-mir-1307	hsa-mir-130b	hsa-mir-143	hsa-mir-183	hsa-mir-191	hsa-mir-324	hsa-mir-331	hsa-mir-671	hsa-mir-744	hsa-mir-93	2	0.367889
hsa-let-7c	hsa-mir-143	hsa-mir-191	hsa-mir-200c	hsa-mir-21						1	0.367428
hsa-mir-15a	hsa-mir-15b	hsa-mir-19a	hsa-mir-590	hsa-mir-93						2	0.367085
hsa-mir-139	hsa-mir-141	hsa-mir-148a	hsa-mir-182	hsa-mir-19a	hsa-mir-200a	hsa-mir-301a	hsa-mir-429	hsa-mir-590	hsa-mir-96	2	0.365378
hsa-mir-128-1	hsa-mir-128-2	hsa-mir-130b	hsa-mir-143	hsa-mir-183	hsa-mir-769	hsa-mir-93				1	0.365346
hsa-let-7c	hsa-mir-15a	hsa-mir-17	hsa-mir-19a	hsa-mir-210	hsa-mir-590	hsa-mir-629				1	0.36174
hsa-mir-135b	hsa-mir-139	hsa-mir-17	hsa-mir-19a	hsa-mir-590	hsa-mir-96					2	0.361357
hsa-mir-142	hsa-mir-148a	hsa-mir-15a	hsa-mir-19a	hsa-mir-210	hsa-mir-590					3	0.36134
hsa-mir-15a	hsa-mir-19a	hsa-mir-210	hsa-mir-590	hsa-mir-629	hsa-mir-93					5	0.360439
hsa-mir-142	hsa-mir-15a	hsa-mir-15b	hsa-mir-19a	hsa-mir-21	hsa-mir-590					2	0.35964
hsa-mir-182	hsa-mir-19a	hsa-mir-425	hsa-mir-590	hsa-mir-96						1	0.359097
hsa-mir-142	hsa-mir-15a	hsa-mir-19a	hsa-mir-21	hsa-mir-590	hsa-mir-629					6	0.358459
hsa-mir-1307	hsa-mir-130b	hsa-mir-15b	hsa-mir-191	hsa-mir-21	hsa-mir-331	hsa-mir-590	hsa-mir-671			1	0.358007
hsa-mir-106b	hsa-mir-130b	hsa-mir-15b	hsa-mir-19a	hsa-mir-590	hsa-mir-93					2	0.357013
hsa-mir-142	hsa-mir-15a	hsa-mir-19a	hsa-mir-210	hsa-mir-590	hsa-mir-629					5	0.3566
hsa-mir-142	hsa-mir-15b	hsa-mir-19a	hsa-mir-200c	hsa-mir-21	hsa-mir-590	hsa-mir-671				2	0.356183
hsa-mir-128-1	hsa-mir-128-2	hsa-mir-145	hsa-mir-151							2	0.355943
hsa-mir-1307	hsa-mir-15b	hsa-mir-182	hsa-mir-191	hsa-mir-200c	hsa-mir-590	hsa-mir-671				2	0.35576
hsa-let-7c	hsa-mir-142	hsa-mir-15a	hsa-mir-19a	hsa-mir-200c	hsa-mir-21	hsa-mir-590	hsa-mir-629			2	0.355694
hsa-mir-15a	hsa-mir-19a	hsa-mir-210	hsa-mir-590	hsa-mir-629	hsa-mir-7-1					3	0.355504
hsa-mir-1307	hsa-mir-139	hsa-mir-15b	hsa-mir-182	hsa-mir-200c	hsa-mir-590	hsa-mir-671				2	0.353396
hsa-mir-1307	hsa-mir-15b	hsa-mir-191	hsa-mir-200c	hsa-mir-331	hsa-mir-590	hsa-mir-671	hsa-mir-93			1	0.352192
hsa-let-7c	hsa-mir-191	hsa-mir-200c	hsa-mir-21	hsa-mir-590						1	0.351372
hsa-mir-139	hsa-mir-15b	hsa-mir-19a	hsa-mir-200c	hsa-mir-21	hsa-mir-590	hsa-mir-671				2	0.350886
hsa-mir-141	hsa-mir-142	hsa-mir-148a	hsa-mir-19a	hsa-mir-200c	hsa-mir-301a	hsa-mir-590	hsa-mir-96			1	0.350539
hsa-mir-130b	hsa-mir-19a	hsa-mir-590	hsa-mir-629	hsa-mir-7-1	hsa-mir-93					7	0.349367
hsa-mir-130b	hsa-mir-18a	hsa-mir-331	hsa-mir-590	hsa-mir-93	hsa-mir-96					1	0.347729
hsa-mir-182	hsa-mir-183	hsa-mir-191	hsa-mir-200c	hsa-mir-590	hsa-mir-96					2	0.347684
hsa-mir-15a	hsa-mir-19a	hsa-mir-200c	hsa-mir-590	hsa-mir-629	hsa-mir-93	hsa-mir-96				1	0.347675
hsa-mir-139	hsa-mir-17	hsa-mir-19a	hsa-mir-590	hsa-mir-629	hsa-mir-96					4	0.346277
hsa-mir-130b	hsa-mir-15b	hsa-mir-19a	hsa-mir-590	hsa-mir-93						4	0.344764
hsa-mir-15b	hsa-mir-19a	hsa-mir-200c	hsa-mir-590	hsa-mir-671	hsa-mir-93					1	0.34389
hsa-let-7c	hsa-mir-139	hsa-mir-15a	hsa-mir-17	hsa-mir-19a	hsa-mir-590	hsa-mir-629	hsa-mir-96			1	0.343589
hsa-mir-135b	hsa-mir-139	hsa-mir-182	hsa-mir-19a	hsa-mir-590	hsa-mir-96					1	0.342927
hsa-let-7c	hsa-mir-139	hsa-mir-15a	hsa-mir-19a	hsa-mir-200c	hsa-mir-21	hsa-mir-590	hsa-mir-629			1	0.34255
hsa-mir-106b	hsa-mir-19a	hsa-mir-200c	hsa-mir-590	hsa-mir-93						2	0.342413
hsa-let-7c	hsa-mir-142	hsa-mir-15a	hsa-mir-19a	hsa-mir-200c	hsa-mir-590	hsa-mir-629	hsa-mir-96			1	0.339152
hsa-mir-139	hsa-mir-141	hsa-mir-148a	hsa-mir-182	hsa-mir-19a	hsa-mir-200c	hsa-mir-301a	hsa-mir-590	hsa-mir-96		1	0.33877
hsa-mir-142	hsa-mir-148a	hsa-mir-19a	hsa-mir-210	hsa-mir-590						5	0.337458
hsa-mir-130b	hsa-mir-19a	hsa-mir-590	hsa-mir-629	hsa-mir-708	hsa-mir-93					2	0.337414
hsa-mir-141	hsa-mir-142	hsa-mir-19a	hsa-mir-200c	hsa-mir-301a	hsa-mir-590	hsa-mir-629	hsa-mir-96			1	0.335947
hsa-mir-139	hsa-mir-17	hsa-mir-19a	hsa-mir-590	hsa-mir-629	hsa-mir-7-1	hsa-mir-96				1	0.335642
hsa-mir-130b	hsa-mir-15b	hsa-mir-19a	hsa-mir-590	hsa-mir-93	hsa-mir-96					1	0.334667
hsa-mir-1307	hsa-mir-15b	hsa-mir-182	hsa-mir-191	hsa-mir-200c	hsa-mir-590	hsa-mir-96				1	0.333572
hsa-mir-15a	hsa-mir-19a	hsa-mir-200c	hsa-mir-210	hsa-mir-590	hsa-mir-629	hsa-mir-93				1	0.33331
hsa-mir-130b	hsa-mir-19a	hsa-mir-21	hsa-mir-345	hsa-mir-590						2	0.332696
hsa-mir-1307	hsa-mir-142	hsa-mir-15b	hsa-mir-200c	hsa-mir-590	hsa-mir-96					2	0.332689
hsa-mir-130b	hsa-mir-19a	hsa-mir-210	hsa-mir-590	hsa-mir-629	hsa-mir-93					7	0.332366
hsa-mir-1307	hsa-mir-130b	hsa-mir-15b	hsa-mir-191	hsa-mir-331	hsa-mir-590	hsa-mir-671	hsa-mir-93			1	0.331877
hsa-let-7c	hsa-mir-142	hsa-mir-15a	hsa-mir-19a	hsa-mir-200c	hsa-mir-210	hsa-mir-590	hsa-mir-629			1	0.331639
hsa-mir-1307	hsa-mir-139	hsa-mir-15b	hsa-mir-182	hsa-mir-200c	hsa-mir-590	hsa-mir-96				1	0.331341
hsa-mir-15b	hsa-mir-19a	hsa-mir-200c	hsa-mir-590	hsa-mir-93	hsa-mir-96					2	0.330162
hsa-mir-130b	hsa-mir-141	hsa-mir-19a	hsa-mir-21	hsa-mir-590	hsa-mir-629					2	0.330155
hsa-mir-142	hsa-mir-148a	hsa-mir-15b	hsa-mir-19a	hsa-mir-590						2	0.330107
hsa-mir-1307	hsa-mir-183	hsa-mir-191	hsa-mir-200c	hsa-mir-21	hsa-mir-331	hsa-mir-590	hsa-mir-671			2	0.32997
hsa-mir-130b	hsa-mir-15b	hsa-mir-19a	hsa-mir-590	hsa-mir-671	hsa-mir-93					2	0.328591
hsa-mir-130b	hsa-mir-15b	hsa-mir-19a	hsa-mir-21	hsa-mir-590	hsa-mir-671					2	0.328297
hsa-mir-1307	hsa-mir-182	hsa-mir-183	hsa-mir-191	hsa-mir-200c	hsa-mir-590	hsa-mir-96				2	0.327592
hsa-mir-142	hsa-mir-15b	hsa-mir-19a	hsa-mir-200c	hsa-mir-590	hsa-mir-96					2	0.326663
hsa-mir-142	hsa-mir-19a	hsa-mir-210	hsa-mir-590	hsa-mir-629						5	0.325396
hsa-mir-141	hsa-mir-142	hsa-mir-148a	hsa-mir-19a	hsa-mir-200c	hsa-mir-210	hsa-mir-301a	hsa-mir-590			1	0.323942
hsa-let-7c	hsa-mir-182	hsa-mir-191	hsa-mir-200c	hsa-mir-590	hsa-mir-96					2	0.32382
hsa-mir-19a	hsa-mir-200c	hsa-mir-590	hsa-mir-629	hsa-mir-93	hsa-mir-96					3	0.322714
hsa-mir-128-1	hsa-mir-128-2	hsa-mir-143	hsa-mir-145							2	0.321991
hsa-mir-130b	hsa-mir-17	hsa-mir-181b-1	hsa-mir-93							2	0.321564
hsa-mir-106b	hsa-mir-130b	hsa-mir-143	hsa-mir-183	hsa-mir-191	hsa-mir-93					2	0.32149
hsa-mir-141	hsa-mir-142	hsa-mir-19a	hsa-mir-200c	hsa-mir-21	hsa-mir-590	hsa-mir-629				1	0.321203
hsa-let-7c	hsa-mir-139	hsa-mir-15a	hsa-mir-182	hsa-mir-19a	hsa-mir-200c	hsa-mir-590	hsa-mir-629	hsa-mir-96		1	0.320318
hsa-mir-139	hsa-mir-15b	hsa-mir-182	hsa-mir-19a	hsa-mir-200c	hsa-mir-590	hsa-mir-96				1	0.320143
hsa-mir-130b	hsa-mir-15b	hsa-mir-484	hsa-mir-93							2	0.319492
hsa-mir-142	hsa-mir-15b	hsa-mir-19a	hsa-mir-21	hsa-mir-590						3	0.318855
hsa-mir-142	hsa-mir-19a	hsa-mir-21	hsa-mir-590	hsa-mir-629						11	0.318508
hsa-mir-182	hsa-mir-183	hsa-mir-191	hsa-mir-200c	hsa-mir-590	hsa-mir-93	hsa-mir-96				2	0.31843
hsa-mir-19a	hsa-mir-210	hsa-mir-590	hsa-mir-629	hsa-mir-7-1	hsa-mir-93					6	0.318192
hsa-mir-142	hsa-mir-19a	hsa-mir-200c	hsa-mir-21	hsa-mir-590	hsa-mir-629					4	0.316897
hsa-mir-182	hsa-mir-19a	hsa-mir-200c	hsa-mir-590	hsa-mir-629	hsa-mir-93	hsa-mir-96				1	0.316717
hsa-mir-141	hsa-mir-142	hsa-mir-148a	hsa-mir-19a	hsa-mir-200c	hsa-mir-210					2	0.316074
hsa-mir-141	hsa-mir-142	hsa-mir-19a	hsa-mir-200c	hsa-mir-210	hsa-mir-301a	hsa-mir-590	hsa-mir-629			1	0.315958
hsa-mir-106b	hsa-mir-130b	hsa-mir-15b	hsa-mir-19a	hsa-mir-21	hsa-mir-590					2	0.315858
hsa-mir-130b	hsa-mir-141	hsa-mir-19a	hsa-mir-200b	hsa-mir-21	hsa-mir-590					1	0.315232
hsa-mir-19a	hsa-mir-210	hsa-mir-590	hsa-mir-629	hsa-mir-708	hsa-mir-93					2	0.315187
hsa-mir-130b	hsa-mir-183	hsa-mir-191	hsa-mir-345	hsa-mir-590	hsa-mir-7-1	hsa-mir-93	hsa-mir-96			1	0.314843
hsa-mir-142	hsa-mir-19a	hsa-mir-210	hsa-mir-450b	hsa-mir-590						4	0.31352
hsa-mir-130b	hsa-mir-15b	hsa-mir-19a	hsa-mir-21	hsa-mir-590						4	0.313471
hsa-let-7c	hsa-mir-143	hsa-mir-200c	hsa-mir-210							2	0.312475
hsa-mir-130b	hsa-mir-183	hsa-mir-191	hsa-mir-590	hsa-mir-93	hsa-mir-96					3	0.3122
hsa-mir-139	hsa-mir-141	hsa-mir-19a	hsa-mir-200c	hsa-mir-21	hsa-mir-590	hsa-mir-629				1	0.31132
hsa-mir-130b	hsa-mir-19a	hsa-mir-21	hsa-mir-590	hsa-mir-629						19	0.311287
hsa-mir-182	hsa-mir-19a	hsa-mir-200c	hsa-mir-590	hsa-mir-629	hsa-mir-7-1	hsa-mir-93	hsa-mir-96			1	0.310894
hsa-mir-130b	hsa-mir-143	hsa-mir-183	hsa-mir-191	hsa-mir-345	hsa-mir-93					2	0.309051
hsa-mir-106b	hsa-mir-130b	hsa-mir-183	hsa-mir-191	hsa-mir-590	hsa-mir-93					1	0.308534
hsa-mir-182	hsa-mir-183	hsa-mir-191	hsa-mir-200c	hsa-mir-590	hsa-mir-7-1	hsa-mir-93	hsa-mir-96			2	0.308201
hsa-mir-142	hsa-mir-148a	hsa-mir-19a	hsa-mir-210	hsa-mir-590	hsa-mir-7-1					2	0.307769
hsa-mir-142	hsa-mir-19a	hsa-mir-200c	hsa-mir-590	hsa-mir-629	hsa-mir-96					4	0.307582
hsa-mir-106b	hsa-mir-130b	hsa-mir-19a	hsa-mir-25	hsa-mir-93						2	0.307223
hsa-mir-106b	hsa-mir-19a	hsa-mir-200c	hsa-mir-21	hsa-mir-590						2	0.306944
hsa-mir-1307	hsa-mir-15b	hsa-mir-191	hsa-mir-200c	hsa-mir-331	hsa-mir-590	hsa-mir-93	hsa-mir-96			1	0.306926
hsa-mir-139	hsa-mir-15b	hsa-mir-182	hsa-mir-19a	hsa-mir-200c	hsa-mir-590	hsa-mir-671				1	0.306809
hsa-mir-130b	hsa-mir-183	hsa-mir-191	hsa-mir-425	hsa-mir-590	hsa-mir-93	hsa-mir-96				1	0.306662
hsa-mir-142	hsa-mir-19a	hsa-mir-210	hsa-mir-590	hsa-mir-629	hsa-mir-7-1					6	0.306431
hsa-mir-139	hsa-mir-141	hsa-mir-19a	hsa-mir-200b	hsa-mir-21	hsa-mir-590					2	0.306315
hsa-mir-1307	hsa-mir-130b	hsa-mir-183	hsa-mir-191	hsa-mir-21	hsa-mir-331	hsa-mir-590	hsa-mir-671			1	0.305107
hsa-mir-1307	hsa-mir-182	hsa-mir-183	hsa-mir-191	hsa-mir-200c	hsa-mir-590	hsa-mir-671				2	0.304696
hsa-mir-19a	hsa-mir-200c	hsa-mir-210	hsa-mir-590	hsa-mir-629	hsa-mir-93					4	0.303377
hsa-mir-106b	hsa-mir-143	hsa-mir-183	hsa-mir-191	hsa-mir-200c	hsa-mir-93					2	0.303067
hsa-mir-106b	hsa-mir-130b	hsa-mir-19a	hsa-mir-21	hsa-mir-590						6	0.302597
hsa-mir-128-2	hsa-mir-130b	hsa-mir-143	hsa-mir-183	hsa-mir-301a	hsa-mir-769	hsa-mir-93				1	0.301882
hsa-mir-142	hsa-mir-19a	hsa-mir-200c	hsa-mir-21	hsa-mir-450b	hsa-mir-590	hsa-mir-96				1	0.301178
hsa-mir-1307	hsa-mir-183	hsa-mir-191	hsa-mir-200c	hsa-mir-331	hsa-mir-590	hsa-mir-671	hsa-mir-93			2	0.300172
hsa-mir-106b	hsa-mir-143	hsa-mir-183	hsa-mir-191	hsa-mir-200c	hsa-mir-21					2	0.299991
hsa-mir-139	hsa-mir-182	hsa-mir-19a	hsa-mir-200c	hsa-mir-590	hsa-mir-629	hsa-mir-96				2	0.299218
hsa-mir-142	hsa-mir-19a	hsa-mir-200c	hsa-mir-210	hsa-mir-450b	hsa-mir-590					1	0.298875
hsa-mir-18a	hsa-mir-210	hsa-mir-331	hsa-mir-590	hsa-mir-93						2	0.298733
hsa-mir-142	hsa-mir-19a	hsa-mir-200c	hsa-mir-210	hsa-mir-590	hsa-mir-629					4	0.298381
hsa-mir-1307	hsa-mir-130b	hsa-mir-183	hsa-mir-191	hsa-mir-331	hsa-mir-590	hsa-mir-671	hsa-mir-93			1	0.297295
hsa-mir-1307	hsa-mir-130b	hsa-mir-15b	hsa-mir-191	hsa-mir-331	hsa-mir-590	hsa-mir-93	hsa-mir-96			1	0.297221
hsa-mir-130b	hsa-mir-181b-1	hsa-mir-93								5	0.297066
hsa-mir-139	hsa-mir-182	hsa-mir-19a	hsa-mir-200c	hsa-mir-590	hsa-mir-629	hsa-mir-7-1	hsa-mir-96			1	0.297029
hsa-mir-1307	hsa-mir-130b	hsa-mir-183	hsa-mir-191	hsa-mir-331	hsa-mir-590	hsa-mir-93	hsa-mir-96			2	0.296452
hsa-mir-143	hsa-mir-183	hsa-mir-191	hsa-mir-200c	hsa-mir-21						5	0.296373
hsa-mir-15a	hsa-mir-15b	hsa-mir-484	hsa-mir-93							2	0.295882
hsa-mir-139	hsa-mir-19a	hsa-mir-200c	hsa-mir-21	hsa-mir-590	hsa-mir-629					2	0.294749
hsa-mir-128-1	hsa-mir-143	hsa-mir-183	hsa-mir-200c	hsa-mir-93						1	0.29377
hsa-mir-142	hsa-mir-19a	hsa-mir-200c	hsa-mir-590	hsa-mir-629	hsa-mir-7-1					2	0.292538
hsa-mir-142	hsa-mir-19a	hsa-mir-21	hsa-mir-450b	hsa-mir-590						5	0.292197
hsa-mir-130b	hsa-mir-19a	hsa-mir-21	hsa-mir-590	hsa-mir-629	hsa-mir-708					2	0.291471
hsa-mir-130b	hsa-mir-143	hsa-mir-183	hsa-mir-191	hsa-mir-425	hsa-mir-93					2	0.29105
hsa-mir-19a	hsa-mir-200c	hsa-mir-210	hsa-mir-590	hsa-mir-629	hsa-mir-7-1	hsa-mir-93				1	0.289694
hsa-mir-1307	hsa-mir-183	hsa-mir-191	hsa-mir-200c	hsa-mir-331	hsa-mir-590	hsa-mir-93	hsa-mir-96			2	0.288719
hsa-mir-183	hsa-mir-191	hsa-mir-200c	hsa-mir-590	hsa-mir-93	hsa-mir-96					2	0.287379
hsa-mir-130b	hsa-mir-183	hsa-mir-191	hsa-mir-21	hsa-mir-345	hsa-mir-590					1	0.286503
hsa-mir-130b	hsa-mir-143	hsa-mir-183	hsa-mir-191	hsa-mir-93						2	0.286132
hsa-mir-142	hsa-mir-19a	hsa-mir-200c	hsa-mir-210	hsa-mir-590	hsa-mir-629	hsa-mir-7-1				1	0.284636
hsa-mir-106b	hsa-mir-148a	hsa-mir-19a	hsa-mir-590							2	0.283162
hsa-mir-130b	hsa-mir-19a	hsa-mir-450b	hsa-mir-590	hsa-mir-629						2	0.282475
hsa-mir-130b	hsa-mir-143	hsa-mir-183	hsa-mir-191	hsa-mir-301a	hsa-mir-769	hsa-mir-93				1	0.28067
hsa-mir-130b	hsa-mir-143	hsa-mir-183	hsa-mir-191	hsa-mir-21	hsa-mir-345					2	0.278522
hsa-mir-130b	hsa-mir-143	hsa-mir-210	hsa-mir-345	hsa-mir-93						2	0.277566
hsa-mir-106b	hsa-mir-130b	hsa-mir-143	hsa-mir-183	hsa-mir-191	hsa-mir-21					2	0.277373
hsa-mir-142	hsa-mir-15b	hsa-mir-19a	hsa-mir-21	hsa-mir-450b	hsa-mir-590					1	0.276452
hsa-mir-106b	hsa-mir-183	hsa-mir-191	hsa-mir-200c	hsa-mir-590	hsa-mir-93					2	0.276102
hsa-mir-106b	hsa-mir-183	hsa-mir-191	hsa-mir-200c	hsa-mir-21	hsa-mir-590					2	0.273927
hsa-mir-183	hsa-mir-191	hsa-mir-200c	hsa-mir-21	hsa-mir-590						4	0.273149
hsa-mir-143	hsa-mir-183	hsa-mir-191	hsa-mir-200c	hsa-mir-93						4	0.270546
hsa-mir-106b	hsa-mir-130b	hsa-mir-181b-1	hsa-mir-25	hsa-mir-93						2	0.270397
hsa-mir-130b	hsa-mir-143	hsa-mir-181b-1	hsa-mir-93							2	0.266751
hsa-mir-130b	hsa-mir-143	hsa-mir-210	hsa-mir-301a	hsa-mir-93						2	0.265657
hsa-mir-106b	hsa-mir-130b	hsa-mir-183	hsa-mir-191	hsa-mir-21	hsa-mir-590					2	0.265318
hsa-mir-130b	hsa-mir-19a	hsa-mir-21	hsa-mir-450b	hsa-mir-590						2	0.263601
hsa-mir-195	hsa-mir-200c	hsa-mir-590	hsa-mir-93							2	0.257146
hsa-mir-143	hsa-mir-183	hsa-mir-191	hsa-mir-200c	hsa-mir-301a	hsa-mir-93					1	0.256915
hsa-mir-142	hsa-mir-342									2	0.256474
hsa-mir-130b	hsa-mir-141	hsa-mir-183	hsa-mir-191	hsa-mir-200b	hsa-mir-21	hsa-mir-590				1	0.255511
hsa-mir-143	hsa-mir-195	hsa-mir-200c	hsa-mir-93							2	0.253682
hsa-mir-142	hsa-mir-148a	hsa-mir-19a	hsa-mir-590	hsa-mir-625						2	0.25186
hsa-mir-141	hsa-mir-183	hsa-mir-191	hsa-mir-200c	hsa-mir-21	hsa-mir-590					3	0.250396
hsa-mir-130b	hsa-mir-143	hsa-mir-210	hsa-mir-93							2	0.249886
hsa-mir-200c	hsa-mir-210	hsa-mir-331	hsa-mir-590	hsa-mir-93						2	0.249189
hsa-mir-130b	hsa-mir-183	hsa-mir-191	hsa-mir-21	hsa-mir-590						3	0.248186
hsa-mir-143	hsa-mir-200c	hsa-mir-210	hsa-mir-331	hsa-mir-93						2	0.248027
hsa-mir-143	hsa-mir-200c	hsa-mir-210	hsa-mir-301a	hsa-mir-93						2	0.246179
hsa-mir-130b	hsa-mir-15b	hsa-mir-19a	hsa-mir-21	hsa-mir-450b						2	0.243484
hsa-mir-142	hsa-mir-15b	hsa-mir-19a	hsa-mir-21	hsa-mir-210	hsa-mir-450b					2	0.240803
hsa-mir-143	hsa-mir-200c	hsa-mir-210	hsa-mir-93							5	0.24077
hsa-mir-106b	hsa-mir-130b	hsa-mir-19a	hsa-mir-21	hsa-mir-590	hsa-mir-625					2	0.233242
hsa-mir-139	hsa-mir-145	hsa-mir-21								2	0.224995
hsa-let-7c	hsa-mir-143	hsa-mir-181b-1								2	0.222908
hsa-mir-142	hsa-mir-19a	hsa-mir-21	hsa-mir-590	hsa-mir-625						2	0.21642
hsa-mir-330	hsa-mir-629									6	0.209536
hsa-mir-130b	hsa-mir-15b	hsa-mir-19a	hsa-mir-450b	hsa-mir-629						2	0.208788
hsa-mir-106b	hsa-mir-130b	hsa-mir-19a	hsa-mir-21	hsa-mir-25						2	0.204825
hsa-mir-130b	hsa-mir-143	hsa-mir-183	hsa-mir-191	hsa-mir-21						2	0.204711
hsa-mir-106b	hsa-mir-148a	hsa-mir-19a	hsa-mir-590	hsa-mir-625						2	0.204542
hsa-mir-183	hsa-mir-330									2	0.203147
hsa-mir-224	hsa-mir-590	hsa-mir-629	hsa-mir-93							2	0.192797
hsa-mir-342	hsa-mir-484									2	0.192629
hsa-mir-224	hsa-mir-590	hsa-mir-629	hsa-mir-21							2	0.183279
hsa-mir-330	hsa-mir-484									2	0.18157
hsa-mir-143	hsa-mir-145	hsa-mir-21								2	0.176253
hsa-mir-106b	hsa-mir-25	hsa-mir-330								2	0.173536
hsa-let-7c	hsa-mir-17	hsa-mir-181b-1								2	0.172288
hsa-mir-143	hsa-mir-21	hsa-mir-99a								2	0.16597
