# Supplementary material for: Detecting pan-cancer conserved microRNA modules from microRNA expression profiles across multiple cancers
Source: Royal Society of Chemistry journal article supplement (doi:10.1039/c5mb00257e), 2015-06-01
Supplement: c5mb00257e5.xlsx [file c5mb00257e5.xlsx]

## Sheet: Table S5 module1 GO
Category	Term	Count	%	PValue	Genes	List Total	Pop Hits	Pop Total	Fold Enrichment	Bonferroni	Benjamini	FDR
GOTERM_BP_FAT	GO:0022403~cell cycle phase	64	42.953	3.64752e-62	809850, 810085, 809559, 793777, 815649, 807700, 798021, 815446, 817048, 793059, 772477, 815142, 789965, 783593, 809693, 824974, 789909, 789361, 798571, 783225, 784402, 802732, 816657, 813528, 819016, 795770, 814656, 802146, 818488, 820324, 794356, 803990, 819748, 775002, 778615, 812018, 797714, 826285, 799631, 776047, 801471, 773124, 779098, 778468, 819439, 811704, 799856, 777240, 781012, 800860,…	127	414	13528	16.4668	2.64445e-59	2.64445e-59	5.52651e-59
GOTERM_BP_FAT	GO:0007049~cell cycle	75	50.3356	2.51174e-59	810085, 809850, 778255, 809559, 793777, 815649, 807700, 798021, 815446, 817048, 793059, 772477, 815142, 789965, 783593, 809693, 824974, 789909, 789361, 798571, 783225, 784402, 802732, 816657, 813528, 808768, 819016, 779946, 795770, 796628, 814656, 823221, 802146, 818488, 820324, 794356, 803990, 819748, 775002, 778615, 812018, 809353, 797714, 826285, 799631, 776047, 801471, 773124, 779098, 778468,…	127	776	13528	10.2951	1.82101e-56	9.10505e-57	3.80564e-56
GOTERM_BP_FAT	GO:0000279~M phase	58	38.9262	5.41354e-59	809850, 810085, 809559, 793777, 815649, 798021, 817048, 793059, 772477, 815142, 789965, 783593, 809693, 824974, 789909, 789361, 798571, 783225, 784402, 802732, 816657, 813528, 819016, 814656, 802146, 818488, 820324, 794356, 803990, 819748, 775002, 778615, 812018, 797714, 826285, 799631, 776047, 801471, 773124, 779098, 819439, 811704, 799856, 777240, 800860, 797226, 817790, 791562, 823458, 782105,…	127	329	13528	18.7785	3.92482e-56	1.30827e-56	8.20229e-56
GOTERM_BP_FAT	GO:0022402~cell cycle process	66	44.2953	3.19794e-56	809850, 810085, 809559, 793777, 815649, 807700, 798021, 815446, 817048, 793059, 772477, 815142, 789965, 783593, 809693, 824974, 789909, 789361, 798571, 783225, 784402, 802732, 816657, 813528, 808768, 819016, 795770, 814656, 802146, 818488, 820324, 794356, 803990, 819748, 775002, 778615, 812018, 797714, 826285, 799631, 776047, 801471, 773124, 779098, 778468, 819439, 811704, 799856, 777240, 812228,…	127	565	13528	12.443	2.3185e-53	5.79626e-54	4.84534e-53
GOTERM_BP_FAT	GO:0000278~mitotic cell cycle	53	35.5705	2.04278e-48	809850, 810085, 809559, 815649, 807700, 815446, 793059, 815142, 789965, 783593, 809693, 824974, 789909, 789361, 798571, 784402, 802732, 816657, 813528, 808768, 795770, 814656, 802146, 820324, 803990, 819748, 775002, 778615, 812018, 797714, 826285, 801471, 773124, 819439, 778468, 779098, 811704, 799856, 777240, 781012, 800860, 817790, 791562, 823458, 782105, 787104, 800610, 803455, 802123, 821580,…	127	370	13528	15.2582	1.48101e-45	2.96203e-46	3.09511e-45
GOTERM_BP_FAT	GO:0000280~nuclear division	44	29.5302	5.25271e-46	809850, 820324, 810085, 803990, 819748, 809559, 775002, 812018, 778615, 815649, 797714, 826285, 801471, 773124, 819439, 779098, 793059, 815142, 811704, 799856, 789965, 783593, 809693, 777240, 824974, 800860, 789909, 789361, 817790, 798571, 791562, 823458, 784402, 782105, 787104, 800610, 802732, 803455, 816657, 813528, 821580, 818768, 802146, 807581	127	220	13528	21.3039	3.80821e-43	6.34702e-44	7.95861e-43
GOTERM_BP_FAT	GO:0007067~mitosis	44	29.5302	5.25271e-46	809850, 820324, 810085, 803990, 819748, 809559, 775002, 812018, 778615, 815649, 797714, 826285, 801471, 773124, 819439, 779098, 793059, 815142, 811704, 799856, 789965, 783593, 809693, 777240, 824974, 800860, 789909, 789361, 817790, 798571, 791562, 823458, 784402, 782105, 787104, 800610, 802732, 803455, 816657, 813528, 821580, 818768, 802146, 807581	127	220	13528	21.3039	3.80821e-43	6.34702e-44	7.95861e-43
GOTERM_BP_FAT	GO:0000087~M phase of mitotic cell cycle	44	29.5302	1.20945e-45	809850, 820324, 810085, 803990, 819748, 809559, 775002, 812018, 778615, 815649, 797714, 826285, 801471, 773124, 819439, 779098, 793059, 815142, 811704, 799856, 789965, 783593, 809693, 777240, 824974, 800860, 789909, 789361, 817790, 798571, 791562, 823458, 784402, 782105, 787104, 800610, 802732, 803455, 816657, 813528, 821580, 818768, 802146, 807581	127	224	13528	20.9235	8.7685e-43	1.25264e-43	1.83249e-42
GOTERM_BP_FAT	GO:0048285~organelle fission	44	29.5302	3.3501e-45	809850, 820324, 810085, 803990, 819748, 809559, 775002, 812018, 778615, 815649, 797714, 826285, 801471, 773124, 819439, 779098, 793059, 815142, 811704, 799856, 789965, 783593, 809693, 777240, 824974, 800860, 789909, 789361, 817790, 798571, 791562, 823458, 784402, 782105, 787104, 800610, 802732, 803455, 816657, 813528, 821580, 818768, 802146, 807581	127	229	13528	20.4667	2.42882e-42	3.03603e-43	5.07589e-42
GOTERM_BP_FAT	GO:0051301~cell division	44	29.5302	3.20532e-40	809850, 820324, 810085, 803990, 786961, 819748, 809559, 775002, 812018, 778615, 815649, 797714, 826285, 773124, 819439, 817048, 779098, 793059, 815142, 811704, 789965, 783593, 809693, 777240, 824974, 800860, 789361, 817790, 798571, 791562, 823458, 808689, 787104, 800610, 802732, 803455, 813528, 795770, 796628, 821580, 818768, 802146, 807581, 801800	127	295	13528	15.8877	2.32386e-37	2.58206e-38	4.85652e-37
GOTERM_BP_FAT	GO:0007059~chromosome segregation	23	15.4362	7.1541e-27	809850, 803990, 789909, 786961, 789361, 776843, 809559, 798571, 815649, 791562, 784402, 808689, 797714, 826285, 773124, 819439, 793059, 821580, 799856, 802146, 789965, 783593, 824595	127	81	13528	30.2463	5.18672e-24	5.18672e-25	1.08395e-23
GOTERM_BP_FAT	GO:0006259~DNA metabolic process	34	22.8188	2.43868e-19	794356, 778255, 776843, 793777, 814188, 778911, 778316, 818221, 811587, 799631, 819439, 772477, 806957, 778428, 801381, 781012, 797226, 810288, 778227, 777982, 817790, 783225, 784402, 800610, 776417, 803455, 789814, 819016, 795770, 792151, 774790, 802123, 823221, 818488	127	506	13528	7.15745	1.76804e-16	1.60731e-17	3.69495e-16
GOTERM_BP_FAT	GO:0051726~regulation of cell cycle	28	18.7919	2.60224e-18	794356, 819748, 775002, 778615, 812018, 815649, 807700, 826285, 776047, 778468, 817048, 815446, 815142, 789965, 783593, 789909, 817790, 798571, 791562, 802732, 800610, 803455, 795770, 796628, 802123, 809433, 814656, 800716	127	331	13528	9.01073	1.88663e-15	1.57219e-16	3.94277e-15
GOTERM_BP_FAT	GO:0000070~mitotic sister chromatid segregation	13	8.72483	2.54772e-16	803990, 789909, 789361, 815649, 791562, 784402, 797714, 826285, 793059, 799856, 802146, 789965, 783593	127	36	13528	38.4654	1.60982e-13	1.24345e-14	3.33067e-13
GOTERM_BP_FAT	GO:0000819~sister chromatid segregation	13	8.72483	3.73877e-16	803990, 789909, 789361, 815649, 791562, 784402, 797714, 826285, 793059, 799856, 802146, 789965, 783593	127	37	13528	37.4258	2.41474e-13	1.72085e-14	4.996e-13
GOTERM_BP_FAT	GO:0007017~microtubule-based process	23	15.4362	1.39942e-15	810085, 787488, 775002, 812018, 791562, 823458, 807700, 782105, 797714, 826285, 808768, 801471, 776047, 817048, 821580, 773315, 814656, 799856, 802146, 789965, 783593, 801800, 809693	127	253	13528	9.68361	1.04639e-12	6.9722e-14	2.18714e-12
GOTERM_BP_FAT	GO:0000226~microtubule cytoskeleton organization	19	12.7517	1.61835e-15	810085, 775002, 812018, 791562, 823458, 782105, 797714, 826285, 808768, 776047, 801471, 817048, 821580, 773315, 814656, 799856, 783593, 801800, 809693	127	147	13528	13.7679	1.20737e-12	7.54952e-14	2.52021e-12
GOTERM_BP_FAT	GO:0051276~chromosome organization	29	19.4631	4.90866e-15	803990, 794356, 786961, 778255, 776843, 814188, 815649, 797714, 826285, 799631, 798021, 819439, 793059, 784083, 799856, 789965, 783593, 824595, 787888, 824974, 789909, 789361, 791562, 784402, 787065, 808768, 779946, 802123, 802146	127	485	13528	6.36922	3.54161e-12	2.08278e-13	7.40519e-12
GOTERM_BP_FAT	GO:0007051~spindle organization	13	8.72483	5.53443e-15	810085, 775002, 812018, 823458, 782105, 797714, 776047, 817048, 821580, 814656, 783593, 809693, 801800	127	45	13528	30.7724	4.02456e-12	2.23599e-13	8.41549e-12
GOTERM_BP_FAT	GO:0006260~DNA replication	20	13.4228	1.10388e-14	778428, 781012, 778255, 776843, 778227, 817790, 814188, 778911, 778316, 784402, 811587, 800610, 803455, 789814, 819016, 795770, 792151, 774790, 802123, 806957	127	190	13528	11.2126	7.96863e-12	4.19442e-13	1.66533e-11
GOTERM_BP_FAT	GO:0006974~response to DNA damage stimulus	25	16.7785	5.45411e-14	794356, 776843, 793777, 778615, 814188, 778911, 778316, 807700, 818221, 799631, 819439, 772477, 815142, 806957, 778428, 801381, 810288, 777982, 776417, 789814, 819016, 802123, 774790, 823221, 818488	127	373	13528	7.13939	3.95212e-11	1.97609e-12	8.25895e-11
GOTERM_BP_FAT	GO:0006281~DNA repair	22	14.7651	1.64939e-13	778428, 801381, 794356, 776843, 810288, 777982, 793777, 814188, 778911, 778316, 818221, 776417, 789814, 799631, 819016, 819439, 774790, 802123, 772477, 823221, 818488, 806957	127	284	13528	8.25152	1.1961e-10	5.69567e-12	2.49967e-10
GOTERM_BP_FAT	GO:0007346~regulation of mitotic cell cycle	16	10.7383	1.00867e-11	789909, 775002, 817790, 812018, 798571, 778615, 815649, 791562, 807700, 802732, 826285, 803455, 815142, 814656, 789965, 783593	127	152	13528	11.2126	7.31278e-09	3.32399e-10	1.52827e-08
GOTERM_BP_FAT	GO:0000075~cell cycle checkpoint	13	8.72483	4.24271e-11	794356, 775002, 798571, 778615, 815649, 807700, 802732, 803455, 802123, 815142, 814656, 789965, 783593	127	91	13528	15.2171	3.07596e-08	1.33737e-09	6.42831e-08
GOTERM_BP_FAT	GO:0051327~M phase of meiotic cell cycle	13	8.72483	1.03412e-10	777240, 794356, 797226, 793777, 791562, 783225, 776417, 799631, 798021, 819016, 817048, 772477, 818488	127	98	13528	14.1302	7.49736e-08	3.1239e-09	1.56684e-07
GOTERM_BP_FAT	GO:0007126~meiosis	13	8.72483	1.03412e-10	777240, 794356, 797226, 793777, 791562, 783225, 776417, 799631, 798021, 819016, 817048, 772477, 818488	127	98	13528	14.1302	7.49736e-08	3.1239e-09	1.56684e-07
GOTERM_BP_FAT	GO:0051321~meiotic cell cycle	13	8.72483	1.31645e-10	777240, 794356, 797226, 793777, 791562, 783225, 776417, 799631, 798021, 819016, 817048, 772477, 818488	127	100	13528	13.8476	9.54423e-08	3.81769e-09	1.99461e-07
GOTERM_BP_FAT	GO:0033554~cellular response to stress	25	16.7785	3.72443e-10	794356, 776843, 793777, 778615, 814188, 778911, 778316, 807700, 818221, 799631, 819439, 772477, 815142, 806957, 778428, 801381, 810288, 777982, 776417, 789814, 819016, 802123, 774790, 823221, 818488	127	566	13528	4.70493	2.70021e-07	1.03854e-08	5.64304e-07
GOTERM_BP_FAT	GO:0010564~regulation of cell cycle process	13	8.72483	6.20311e-10	789909, 817790, 812018, 798571, 815649, 791562, 807700, 802732, 826285, 795770, 809433, 814656, 789965	127	114	13528	12.147	4.49725e-07	1.66565e-08	9.3986e-07
GOTERM_BP_FAT	GO:0051329~interphase of mitotic cell cycle	12	8.05369	2.84486e-09	800610, 803455, 781012, 789361, 819748, 778468, 815446, 795770, 817790, 802123, 798571, 807700	127	103	13528	12.4101	2.06252e-06	7.36616e-08	4.31038e-06
GOTERM_BP_FAT	GO:0006310~DNA recombination	12	8.05369	3.49837e-09	776417, 801381, 794356, 799631, 797226, 819016, 810288, 793777, 777982, 802123, 772477, 783225	127	105	13528	12.1737	2.53632e-06	8.74594e-08	5.30054e-06
GOTERM_BP_FAT	GO:0051325~interphase	12	8.05369	3.87298e-09	800610, 803455, 781012, 789361, 819748, 778468, 815446, 795770, 817790, 802123, 798571, 807700	127	106	13528	12.0588	2.80791e-06	9.3597e-08	5.86812e-06
GOTERM_BP_FAT	GO:0007093~mitotic cell cycle checkpoint	9	6.04027	4.99559e-09	802732, 775002, 778615, 815142, 815649, 814656, 807700, 789965, 783593	127	43	13528	22.2948	3.62179e-06	1.16832e-07	7.56903e-06
GOTERM_BP_FAT	GO:0048015~phosphoinositide-mediated signaling	11	7.38255	8.3732e-09	778428, 810085, 776843, 817048, 775002, 812018, 814188, 778911, 783593, 797714, 782105	127	88	13528	13.315	6.07055e-06	1.89705e-07	1.26866e-05
GOTERM_BP_FAT	GO:0007010~cytoskeleton organization	19	12.7517	1.12746e-07	810085, 775002, 812018, 791562, 823458, 782105, 797714, 826285, 808768, 776047, 801471, 817048, 821580, 773315, 814656, 799856, 783593, 801800, 809693	127	436	13528	4.64191	8.17375e-05	2.47699e-06	0.000170826
GOTERM_BP_FAT	GO:0006323~DNA packaging	11	7.38255	1.31853e-07	826285, 803990, 794356, 808768, 789361, 776843, 793059, 784083, 814188, 787888, 824595	127	117	13528	10.0147	9.55887e-05	2.81156e-06	0.000199776
GOTERM_BP_FAT	GO:0007052~mitotic spindle organization	6	4.02685	1.80382e-07	821580, 823458, 814656, 797714, 801800, 809693	127	15	13528	42.6079	0.000130769	3.73648e-06	0.000273305
GOTERM_BP_FAT	GO:0000724~double-strand break repair via homologous recombination	6	4.02685	6.77899e-07	794356, 799631, 819016, 810288, 793777, 802123	127	19	13528	33.6378	0.000491356	1.3652e-05	0.00102711
GOTERM_BP_FAT	GO:0000725~recombinational repair	6	4.02685	6.77899e-07	794356, 799631, 819016, 810288, 793777, 802123	127	19	13528	33.6378	0.000491356	1.3652e-05	0.00102711
GOTERM_BP_FAT	GO:0051783~regulation of nuclear division	8	5.36913	8.16643e-07	802732, 826285, 789909, 817790, 791562, 815649, 814656, 789965	127	56	13528	15.2171	0.000591891	1.60017e-05	0.00123733
GOTERM_BP_FAT	GO:0007088~regulation of mitosis	8	5.36913	8.16643e-07	802732, 826285, 789909, 817790, 791562, 815649, 814656, 789965	127	56	13528	15.2171	0.000591891	1.60017e-05	0.00123733
GOTERM_BP_FAT	GO:0033043~regulation of organelle organization	13	8.72483	8.3668e-07	809850, 789909, 817790, 815649, 791562, 802732, 826285, 773124, 773315, 774896, 809433, 814656, 789965	127	217	13528	6.38136	0.000606409	1.59628e-05	0.00126768
GOTERM_BP_FAT	GO:0006302~double-strand break repair	8	5.36913	1.6535e-06	801381, 794356, 799631, 819016, 810288, 793777, 802123, 772477	127	62	13528	13.7445	0.00119807	3.07377e-05	0.00250527
GOTERM_BP_FAT	GO:0051640~organelle localization	9	6.04027	2.19113e-06	826285, 808768, 789909, 776047, 789361, 798571, 799856, 789965, 797714	127	92	13528	10.4204	0.00158731	3.97135e-05	0.00331982
GOTERM_BP_FAT	GO:0031577~spindle checkpoint	5	3.3557	3.35218e-06	802732, 798571, 815649, 814656, 789965	127	12	13528	44.3832	0.00242739	5.92747e-05	0.00507892
GOTERM_BP_FAT	GO:0051656~establishment of organelle localization	8	5.36913	3.43704e-06	826285, 808768, 789909, 789361, 798571, 799856, 789965, 797714	127	69	13528	12.3501	0.00248875	5.93282e-05	0.00520748
GOTERM_BP_FAT	GO:0051303~establishment of chromosome localization	5	3.3557	9.04564e-06	789909, 789361, 798571, 799856, 789965	127	15	13528	35.5066	0.00653666	0.000152503	0.0137046
GOTERM_BP_FAT	GO:0050000~chromosome localization	5	3.3557	9.04564e-06	789909, 789361, 798571, 799856, 789965	127	15	13528	35.5066	0.00653666	0.000152503	0.0137046
GOTERM_BP_FAT	GO:0000079~regulation of cyclin-dependent protein kinase activity	7	4.69799	1.03778e-05	800610, 803455, 815446, 817048, 817790, 802123, 796628	127	54	13528	13.8081	0.00749574	0.000170985	0.0157228
GOTERM_BP_FAT	GO:0008283~cell proliferation	16	10.7383	1.28827e-05	778428, 777240, 789909, 778255, 778227, 775002, 817790, 809353, 802732, 800610, 776047, 801471, 778468, 817048, 796628, 781741	127	436	13528	3.90898	0.00929653	0.000207534	0.0195174
GOTERM_BP_FAT	GO:0006261~DNA-dependent DNA replication	7	4.69799	1.5777e-05	789814, 819016, 774790, 802123, 814188, 778911, 806957	127	58	13528	12.8558	0.0113732	0.00024863	0.0239017
GOTERM_BP_FAT	GO:0030071~regulation of mitotic metaphase/anaphase transition	5	3.3557	4.60869e-05	802732, 789909, 815649, 814656, 789965	127	22	13528	24.209	0.0328617	0.000710679	0.0698056
GOTERM_BP_FAT	GO:0051439~regulation of ubiquitin-protein ligase activity during mitotic cell cycle	7	4.69799	5.05804e-05	777240, 800860, 819748, 775002, 812018, 815142, 815649	127	71	13528	10.5019	0.0360074	0.000763702	0.0766092
GOTERM_BP_FAT	GO:0019932~second-messenger-mediated signaling	11	7.38255	6.84555e-05	778428, 810085, 776843, 817048, 775002, 812018, 814188, 778911, 783593, 797714, 782105	127	235	13528	4.98603	0.0484204	0.00101238	0.10367
GOTERM_BP_FAT	GO:0030261~chromosome condensation	5	3.3557	7.7994e-05	826285, 803990, 789361, 776843, 793059	127	25	13528	21.3039	0.0549788	0.00113032	0.118107
GOTERM_BP_FAT	GO:0051438~regulation of ubiquitin-protein ligase activity	7	4.69799	8.60233e-05	777240, 800860, 819748, 775002, 812018, 815142, 815649	127	78	13528	9.55946	0.0604644	0.00122219	0.130258
GOTERM_BP_FAT	GO:0032886~regulation of microtubule-based process	6	4.02685	8.89017e-05	809850, 776047, 773124, 809433, 773315, 789965	127	49	13528	13.0432	0.0624232	0.00123878	0.134614
GOTERM_BP_FAT	GO:0051052~regulation of DNA metabolic process	8	5.36913	9.27475e-05	778428, 803455, 794356, 819016, 802123, 774896, 806957, 800716	127	114	13528	7.47507	0.0650339	0.00126797	0.140434
GOTERM_BP_FAT	GO:0051340~regulation of ligase activity	7	4.69799	0.00010625	777240, 800860, 819748, 775002, 812018, 815142, 815649	127	81	13528	9.2054	0.0741432	0.00142557	0.160864
GOTERM_BP_FAT	GO:0031570~DNA integrity checkpoint	6	4.02685	0.000118496	803455, 794356, 802123, 778615, 815142, 807700	127	52	13528	12.2907	0.0823277	0.00156087	0.179388
GOTERM_BP_FAT	GO:0007094~mitotic cell cycle spindle assembly checkpoint	4	2.68456	0.000123264	802732, 815649, 814656, 789965	127	11	13528	38.7344	0.0854946	0.00159465	0.1866
GOTERM_BP_FAT	GO:0045841~negative regulation of mitotic metaphase/anaphase transition	4	2.68456	0.000123264	802732, 815649, 814656, 789965	127	11	13528	38.7344	0.0854946	0.00159465	0.1866
GOTERM_BP_FAT	GO:0051784~negative regulation of nuclear division	4	2.68456	0.000163235	802732, 815649, 814656, 789965	127	12	13528	35.5066	0.111619	0.00207425	0.247039
GOTERM_BP_FAT	GO:0045839~negative regulation of mitosis	4	2.68456	0.000163235	802732, 815649, 814656, 789965	127	12	13528	35.5066	0.111619	0.00207425	0.247039
GOTERM_BP_FAT	GO:0065004~protein-DNA complex assembly	7	4.69799	0.000202313	794356, 808768, 784083, 814188, 789965, 787888, 824595	127	91	13528	8.19382	0.13644	0.00252597	0.306095
GOTERM_BP_FAT	GO:0007076~mitotic chromosome condensation	4	2.68456	0.000210763	826285, 803990, 789361, 793059	127	13	13528	32.7753	0.141715	0.0025868	0.31886
GOTERM_BP_FAT	GO:0034728~nucleosome organization	7	4.69799	0.00022788	794356, 808768, 778255, 784083, 814188, 787888, 824595	127	93	13528	8.01761	0.152303	0.00275007	0.344714
GOTERM_BP_FAT	GO:0031396~regulation of protein ubiquitination	7	4.69799	0.000338002	777240, 800860, 819748, 775002, 812018, 815142, 815649	127	100	13528	7.45638	0.217368	0.00400985	0.510899
GOTERM_BP_FAT	GO:0031145~anaphase-promoting complex-dependent proteasomal ubiquitin-dependent protein catabolic process	6	4.02685	0.000341969	800860, 819748, 775002, 812018, 815142, 815649	127	65	13528	9.83259	0.219617	0.00399153	0.516881
GOTERM_BP_FAT	GO:0006297~nucleotide-excision repair, DNA gap filling	4	2.68456	0.000487644	778428, 789814, 774790, 778911	127	17	13528	25.0635	0.297864	0.00559742	0.736307
GOTERM_BP_FAT	GO:0034621~cellular macromolecular complex subunit organization	12	8.05369	0.000501731	794356, 808768, 801471, 786961, 778255, 784083, 814188, 776169, 799856, 789965, 787888, 824595	127	357	13528	3.58049	0.305002	0.00566897	0.757503
GOTERM_BP_FAT	GO:0000910~cytokinesis	5	3.3557	0.000556521	777240, 826285, 798571, 807581, 801800	127	41	13528	12.9902	0.332082	0.00618984	0.839897
GOTERM_BP_FAT	GO:0070507~regulation of microtubule cytoskeleton organization	5	3.3557	0.000610704	809850, 773124, 809433, 773315, 789965	127	42	13528	12.6809	0.357826	0.00668808	0.921317
GOTERM_BP_FAT	GO:0007018~microtubule-based movement	7	4.69799	0.000649407	787488, 801471, 823458, 799856, 789965, 802146, 809693	127	113	13528	6.59856	0.375606	0.0070048	0.979437
GOTERM_BP_FAT	GO:0006271~DNA strand elongation during DNA replication	3	2.01342	0.000845014	774790, 778911, 806957	127	5	13528	63.9118	0.458219	0.00897265	1.27269
GOTERM_BP_FAT	GO:0043933~macromolecular complex subunit organization	17	11.4094	0.000904629	794356, 786961, 778255, 814188, 776169, 808768, 801471, 819016, 825479, 784083, 802123, 822866, 799856, 789965, 818488, 824595, 787888	127	710	13528	2.55047	0.481156	0.00946439	1.36191
GOTERM_BP_FAT	GO:0000077~DNA damage checkpoint	5	3.3557	0.00101696	794356, 802123, 778615, 815142, 807700	127	48	13528	11.0958	0.521773	0.0104828	1.5298
GOTERM_BP_FAT	GO:0006334~nucleosome assembly	6	4.02685	0.00111052	794356, 808768, 784083, 814188, 787888, 824595	127	84	13528	7.60855	0.553168	0.011282	1.66944
GOTERM_BP_FAT	GO:0006333~chromatin assembly or disassembly	7	4.69799	0.00119561	794356, 808768, 798021, 784083, 814188, 787888, 824595	127	127	13528	5.87116	0.57993	0.011974	1.79627
GOTERM_BP_FAT	GO:0022616~DNA strand elongation	3	2.01342	0.00125979	774790, 778911, 806957	127	6	13528	53.2598	0.599052	0.0124415	1.89184
GOTERM_BP_FAT	GO:0031497~chromatin assembly	6	4.02685	0.00130003	794356, 808768, 784083, 814188, 787888, 824595	127	87	13528	7.34619	0.610595	0.0126642	1.95172
GOTERM_BP_FAT	GO:0010948~negative regulation of cell cycle process	4	2.68456	0.00156211	802732, 815649, 814656, 789965	127	25	13528	17.0431	0.678069	0.0149986	2.34085
GOTERM_BP_FAT	GO:0006289~nucleotide-excision repair	5	3.3557	0.00169541	778428, 789814, 774790, 778911, 818221	127	55	13528	9.68361	0.70777	0.0160567	2.5382
GOTERM_BP_FAT	GO:0000082~G1/S transition of mitotic cell cycle	5	3.3557	0.00181282	800610, 781012, 789361, 815446, 795770	127	56	13528	9.51069	0.731656	0.0169391	2.71173
GOTERM_BP_FAT	GO:0006284~base-excision repair	4	2.68456	0.00195984	778428, 814188, 818221, 806957	127	27	13528	15.7807	0.758836	0.0180691	2.92862
GOTERM_BP_FAT	GO:0040001~establishment of mitotic spindle localization	3	2.01342	0.00232305	826285, 808768, 797714	127	8	13528	39.9449	0.814772	0.0211177	3.46248
GOTERM_BP_FAT	GO:0010498~proteasomal protein catabolic process	6	4.02685	0.00262375	800860, 819748, 775002, 812018, 815142, 815649	127	102	13528	6.26586	0.851135	0.0235278	3.9024
GOTERM_BP_FAT	GO:0043161~proteasomal ubiquitin-dependent protein catabolic process	6	4.02685	0.00262375	800860, 819748, 775002, 812018, 815142, 815649	127	102	13528	6.26586	0.851135	0.0235278	3.9024
GOTERM_BP_FAT	GO:0006275~regulation of DNA replication	5	3.3557	0.00263785	778428, 803455, 802123, 806957, 800716	127	62	13528	8.5903	0.852654	0.0233643	3.92299
GOTERM_BP_FAT	GO:0007080~mitotic metaphase plate congression	3	2.01342	0.0029686	789361, 799856, 789965	127	9	13528	35.5066	0.884147	0.0259433	4.40459
GOTERM_BP_FAT	GO:0051293~establishment of spindle localization	3	2.01342	0.00368818	826285, 808768, 797714	127	10	13528	31.9559	0.93136	0.0317603	5.44463
GOTERM_BP_FAT	GO:0051653~spindle localization	3	2.01342	0.00368818	826285, 808768, 797714	127	10	13528	31.9559	0.93136	0.0317603	5.44463
GOTERM_BP_FAT	GO:0051437~positive regulation of ubiquitin-protein ligase activity during mitotic cell cycle	5	3.3557	0.00368969	777240, 800860, 819748, 812018, 815142	127	68	13528	7.83233	0.931435	0.0314008	5.44679
GOTERM_BP_FAT	GO:0051443~positive regulation of ubiquitin-protein ligase activity	5	3.3557	0.00409538	777240, 800860, 819748, 812018, 815142	127	70	13528	7.60855	0.948965	0.0343974	6.02846
GOTERM_BP_FAT	GO:0051310~metaphase plate congression	3	2.01342	0.00448038	789361, 799856, 789965	127	11	13528	29.0508	0.961441	0.037148	6.57739
GOTERM_BP_FAT	GO:0051351~positive regulation of ligase activity	5	3.3557	0.00475886	777240, 800860, 819748, 812018, 815142	127	73	13528	7.29587	0.96852	0.0389721	6.97257
GOTERM_BP_FAT	GO:0031572~G2/M transition DNA damage checkpoint	3	2.01342	0.0062771	802123, 778615, 815142	127	13	13528	24.5815	0.989593	0.050555	9.09969
GOTERM_BP_FAT	GO:0042770~DNA damage response, signal transduction	5	3.3557	0.00657948	794356, 802123, 778615, 815142, 807700	127	80	13528	6.65748	0.991653	0.0523537	9.51788
GOTERM_BP_FAT	GO:0045786~negative regulation of cell cycle	5	3.3557	0.00687232	802732, 815649, 814656, 789965, 800716	127	81	13528	6.57529	0.99326	0.0540366	9.92116
GOTERM_BP_FAT	GO:0010638~positive regulation of organelle organization	5	3.3557	0.00748361	826285, 789909, 809433, 773315, 789965	127	83	13528	6.41685	0.995687	0.0580908	10.7576
GOTERM_BP_FAT	GO:0031398~positive regulation of protein ubiquitination	5	3.3557	0.00780226	777240, 800860, 819748, 812018, 815142	127	84	13528	6.34046	0.996582	0.0598599	11.1907
GOTERM_BP_FAT	GO:0051338~regulation of transferase activity	10	6.71141	0.00799328	800610, 803455, 815446, 817048, 817790, 802123, 796628, 774896, 789965, 782320	127	372	13528	2.86343	0.997028	0.0606467	11.4494
GOTERM_BP_FAT	GO:0006325~chromatin organization	10	6.71141	0.0088277	794356, 787065, 808768, 798021, 778255, 779946, 784083, 814188, 787888, 824595	127	378	13528	2.81798	0.998385	0.0661022	12.5713
GOTERM_BP_FAT	GO:0031576~G2/M transition checkpoint	3	2.01342	0.0094826	802123, 778615, 815142	127	16	13528	19.9724	0.999	0.0701319	13.4424
GOTERM_BP_FAT	GO:0032508~DNA duplex unwinding	3	2.01342	0.0119445	801381, 819016, 814188	127	18	13528	17.7533	0.999835	0.0867531	16.6454
GOTERM_BP_FAT	GO:0000080~G1 phase of mitotic cell cycle	3	2.01342	0.0119445	803455, 778468, 817790	127	18	13528	17.7533	0.999835	0.0867531	16.6454
GOTERM_BP_FAT	GO:0032392~DNA geometric change	3	2.01342	0.0119445	801381, 819016, 814188	127	18	13528	17.7533	0.999835	0.0867531	16.6454
GOTERM_BP_FAT	GO:0010604~positive regulation of macromolecule metabolic process	16	10.7383	0.0134307	777240, 794356, 800860, 819748, 812018, 778615, 783225, 814188, 782969, 819016, 778468, 802123, 773315, 815142, 814656, 806957	127	857	13528	1.9887	0.999945	0.0961249	18.5249
GOTERM_BP_FAT	GO:0045787~positive regulation of cell cycle	4	2.68456	0.0160188	826285, 789909, 798571, 789965	127	57	13528	7.47507	0.999992	0.112605	21.7039
GOTERM_BP_FAT	GO:0051318~G1 phase	3	2.01342	0.0160993	803455, 778468, 817790	127	21	13528	15.2171	0.999992	0.112066	21.801
GOTERM_BP_FAT	GO:0007140~male meiosis	3	2.01342	0.0160993	798021, 772477, 818488	127	21	13528	15.2171	0.999992	0.112066	21.801
GOTERM_BP_FAT	GO:0010212~response to ionizing radiation	4	2.68456	0.0183622	794356, 799631, 793777, 802123	127	60	13528	7.10131	0.999999	0.125728	24.4821
GOTERM_BP_FAT	GO:0051231~spindle elongation	2	1.34228	0.018542	823458, 801800	127	2	13528	106.52	0.999999	0.125714	24.6913
GOTERM_BP_FAT	GO:0007079~mitotic chromosome movement towards spindle pole	2	1.34228	0.018542	789909, 789965	127	2	13528	106.52	0.999999	0.125714	24.6913
GOTERM_BP_FAT	GO:0000022~mitotic spindle elongation	2	1.34228	0.018542	823458, 801800	127	2	13528	106.52	0.999999	0.125714	24.6913
GOTERM_BP_FAT	GO:0031399~regulation of protein modification process	8	5.36913	0.0204274	777240, 800860, 819748, 775002, 812018, 815142, 815649, 814656	127	295	13528	2.88867	1	0.136446	26.8538
GOTERM_BP_FAT	GO:0065003~macromolecular complex assembly	13	8.72483	0.0211819	794356, 814188, 776169, 808768, 819016, 825479, 784083, 802123, 822866, 789965, 818488, 824595, 787888	127	665	13528	2.08234	1	0.139892	27.7028
GOTERM_BP_FAT	GO:0006468~protein amino acid phosphorylation	13	8.72483	0.0216259	777240, 791562, 782105, 802732, 816657, 779946, 795770, 807679, 809433, 815142, 814656, 826097, 807581	127	667	13528	2.0761	1	0.141365	28.1981
GOTERM_BP_FAT	GO:0045840~positive regulation of mitosis	3	2.01342	0.0224501	826285, 789909, 789965	127	25	13528	12.7824	1	0.145107	29.1091
GOTERM_BP_FAT	GO:0051785~positive regulation of nuclear division	3	2.01342	0.0224501	826285, 789909, 789965	127	25	13528	12.7824	1	0.145107	29.1091
GOTERM_BP_FAT	GO:0051436~negative regulation of ubiquitin-protein ligase activity during mitotic cell cycle	4	2.68456	0.0226693	800860, 775002, 812018, 815649	127	65	13528	6.55506	1	0.145154	29.3495
GOTERM_BP_FAT	GO:0007242~intracellular signaling cascade	20	13.4228	0.0233614	778428, 810085, 794356, 776843, 775002, 778615, 812018, 814188, 777009, 778911, 807700, 782105, 797714, 797365, 779946, 817048, 802123, 826653, 815142, 783593	127	1256	13528	1.69617	1	0.147999	30.1038
GOTERM_BP_FAT	GO:0051444~negative regulation of ubiquitin-protein ligase activity	4	2.68456	0.024533	800860, 775002, 812018, 815649	127	67	13528	6.35938	1	0.153583	31.3635
GOTERM_BP_FAT	GO:0051352~negative regulation of ligase activity	4	2.68456	0.024533	800860, 775002, 812018, 815649	127	67	13528	6.35938	1	0.153583	31.3635
GOTERM_BP_FAT	GO:0051305~chromosome movement towards spindle pole	2	1.34228	0.0276846	789909, 789965	127	3	13528	71.0131	1	0.170339	34.6477
GOTERM_BP_FAT	GO:0045842~positive regulation of mitotic metaphase/anaphase transition	2	1.34228	0.0276846	789909, 789965	127	3	13528	71.0131	1	0.170339	34.6477
GOTERM_BP_FAT	GO:0008156~negative regulation of DNA replication	3	2.01342	0.0277806	803455, 802123, 800716	127	28	13528	11.4128	1	0.16947	34.7454
GOTERM_BP_FAT	GO:0034622~cellular macromolecular complex assembly	8	5.36913	0.0292178	794356, 808768, 784083, 814188, 776169, 789965, 787888, 824595	127	318	13528	2.67974	1	0.176079	36.1917
GOTERM_BP_FAT	GO:0031401~positive regulation of protein modification process	6	4.02685	0.0305929	777240, 800860, 819748, 812018, 815142, 814656	127	187	13528	3.41774	1	0.182192	37.5476
GOTERM_BP_FAT	GO:0031397~negative regulation of protein ubiquitination	4	2.68456	0.031688	800860, 775002, 812018, 815649	127	74	13528	5.75782	1	0.186654	38.608
GOTERM_BP_FAT	GO:0031110~regulation of microtubule polymerization or depolymerization	3	2.01342	0.0335639	809850, 773124, 773315	127	31	13528	10.3084	1	0.195166	40.3856
GOTERM_BP_FAT	GO:0007019~microtubule depolymerization	2	1.34228	0.0367428	801471, 799856	127	4	13528	53.2598	1	0.210221	43.2884
GOTERM_BP_FAT	GO:0031536~positive regulation of exit from mitosis	2	1.34228	0.0367428	798571, 812018	127	4	13528	53.2598	1	0.210221	43.2884
GOTERM_BP_FAT	GO:0043486~histone exchange	2	1.34228	0.0367428	778255, 824595	127	4	13528	53.2598	1	0.210221	43.2884
GOTERM_BP_FAT	GO:0007095~mitotic cell cycle G2/M transition DNA damage checkpoint	2	1.34228	0.0367428	778615, 815142	127	4	13528	53.2598	1	0.210221	43.2884
GOTERM_BP_FAT	GO:0051299~centrosome separation	2	1.34228	0.0367428	791562, 809693	127	4	13528	53.2598	1	0.210221	43.2884
GOTERM_BP_FAT	GO:0051261~protein depolymerization	2	1.34228	0.0367428	801471, 799856	127	4	13528	53.2598	1	0.210221	43.2884
GOTERM_BP_FAT	GO:0051383~kinetochore organization	2	1.34228	0.0367428	786961, 789965	127	4	13528	53.2598	1	0.210221	43.2884
GOTERM_BP_FAT	GO:0006793~phosphorus metabolic process	16	10.7383	0.0367928	777240, 817790, 791562, 782105, 802732, 800610, 816657, 795770, 815446, 779946, 807679, 809433, 815142, 814656, 826097, 807581	127	973	13528	1.75161	1	0.208869	43.333
GOTERM_BP_FAT	GO:0006796~phosphate metabolic process	16	10.7383	0.0367928	777240, 817790, 791562, 782105, 802732, 800610, 816657, 795770, 815446, 779946, 807679, 809433, 815142, 814656, 826097, 807581	127	973	13528	1.75161	1	0.208869	43.333
GOTERM_BP_FAT	GO:0051493~regulation of cytoskeleton organization	5	3.3557	0.0382421	809850, 773124, 809433, 773315, 789965	127	136	13528	3.91616	1	0.214646	44.6112
GOTERM_BP_FAT	GO:0010639~negative regulation of organelle organization	4	2.68456	0.0410564	802732, 815649, 814656, 789965	127	82	13528	5.19608	1	0.227079	47.0168
GOTERM_BP_FAT	GO:0045859~regulation of protein kinase activity	8	5.36913	0.0424476	800610, 803455, 815446, 817048, 817790, 802123, 796628, 789965	127	345	13528	2.47002	1	0.232225	48.1695
GOTERM_BP_FAT	GO:0000089~mitotic metaphase	2	1.34228	0.0457172	824974, 789965	127	5	13528	42.6079	1	0.24627	50.7872
GOTERM_BP_FAT	GO:0043549~regulation of kinase activity	8	5.36913	0.0494064	800610, 803455, 815446, 817048, 817790, 802123, 796628, 789965	127	357	13528	2.387	1	0.261839	53.5923
