# Supplementary material for: Detecting pan-cancer conserved microRNA modules from microRNA expression profiles across multiple cancers
Source: Royal Society of Chemistry journal article supplement (doi:10.1039/c5mb00257e), 2015-06-01
Supplement: c5mb00257e6.xlsx [file c5mb00257e6.xlsx]

## Sheet: Table S4 module 2 GO
Category	Term	Count	%	PValue	Genes	List Total	Pop Hits	Pop Total	Fold Enrichment	Bonferroni	Benjamini	FDR
GOTERM_BP_FAT	GO:0022403~cell cycle phase	60	4.21941	2.64544e-60	809850, 810085, 809559, 793777, 815649, 807700, 798021, 815446, 817048, 793059, 772477, 815142, 789965, 783593, 809693, 824974, 789909, 789361, 798571, 784402, 802732, 816657, 813528, 819016, 814656, 802146, 818488, 820324, 803990, 819748, 775002, 778615, 812018, 797714, 826285, 813154, 799631, 776047, 801471, 773124, 779098, 819439, 811704, 799856, 777240, 781012, 800860, 797226, 817790, 791562,…	112	414	13528	17.5052	1.80948e-57	1.80948e-57	3.97714e-57
GOTERM_BP_FAT	GO:0000279~M phase	56	3.93812	9.70833e-60	809850, 810085, 809559, 793777, 815649, 798021, 817048, 793059, 772477, 815142, 789965, 783593, 809693, 824974, 789909, 789361, 798571, 784402, 802732, 816657, 813528, 819016, 814656, 802146, 818488, 820324, 803990, 819748, 775002, 778615, 812018, 797714, 826285, 813154, 799631, 776047, 801471, 773124, 819439, 779098, 811704, 799856, 777240, 797226, 800860, 817790, 791562, 782105, 787104, 776417,…	112	329	13528	20.5593	6.64049e-57	3.32025e-57	1.45954e-56
GOTERM_BP_FAT	GO:0007049~cell cycle	70	4.92264	8.8482e-58	810085, 809850, 809559, 793777, 815649, 807700, 798021, 815446, 817048, 793059, 772477, 815142, 789965, 783593, 809693, 824974, 789909, 789361, 798571, 784402, 802732, 816657, 813528, 808768, 819016, 779946, 796628, 814656, 823221, 802146, 818488, 820324, 803990, 819748, 775002, 778615, 812018, 809353, 797714, 826285, 813154, 799631, 776047, 801471, 773124, 779098, 819439, 773315, 799856, 811704,…	112	776	13528	10.8956	6.05217e-55	2.01739e-55	1.33023e-54
GOTERM_BP_FAT	GO:0022402~cell cycle process	62	4.36006	4.9735e-55	809850, 810085, 809559, 793777, 815649, 807700, 798021, 815446, 817048, 793059, 772477, 815142, 789965, 783593, 809693, 824974, 789909, 789361, 798571, 784402, 802732, 816657, 813528, 808768, 819016, 814656, 802146, 818488, 820324, 803990, 819748, 775002, 778615, 812018, 797714, 826285, 813154, 799631, 776047, 801471, 773124, 779098, 819439, 811704, 799856, 777240, 812228, 781012, 800860, 797226,…	112	565	13528	13.2544	3.40188e-52	8.50469e-53	7.47713e-52
GOTERM_BP_FAT	GO:0000278~mitotic cell cycle	51	3.5865	6.3209e-49	809850, 810085, 809559, 815649, 807700, 815446, 793059, 815142, 789965, 783593, 809693, 824974, 789909, 789361, 798571, 784402, 802732, 816657, 813528, 808768, 814656, 802146, 820324, 803990, 819748, 775002, 778615, 812018, 797714, 826285, 813154, 801471, 773124, 819439, 779098, 811704, 799856, 777240, 781012, 800860, 817790, 791562, 782105, 787104, 800610, 803455, 802123, 821580, 818768, 807581,…	112	370	13528	16.6488	4.3235e-46	8.647e-47	9.50281e-46
GOTERM_BP_FAT	GO:0007067~mitosis	43	3.02391	3.51373e-47	809850, 820324, 810085, 803990, 809559, 819748, 775002, 812018, 778615, 815649, 797714, 826285, 801471, 773124, 819439, 779098, 793059, 815142, 811704, 799856, 789965, 783593, 809693, 777240, 824974, 800860, 789909, 789361, 817790, 798571, 791562, 784402, 787104, 782105, 800610, 802732, 803455, 816657, 813528, 821580, 818768, 802146, 807581	112	220	13528	23.6081	2.40339e-44	4.00565e-45	5.28252e-44
GOTERM_BP_FAT	GO:0000280~nuclear division	43	3.02391	3.51373e-47	809850, 820324, 810085, 803990, 809559, 819748, 775002, 812018, 778615, 815649, 797714, 826285, 801471, 773124, 819439, 779098, 793059, 815142, 811704, 799856, 789965, 783593, 809693, 777240, 824974, 800860, 789909, 789361, 817790, 798571, 791562, 784402, 787104, 782105, 800610, 802732, 803455, 816657, 813528, 821580, 818768, 802146, 807581	112	220	13528	23.6081	2.40339e-44	4.00565e-45	5.28252e-44
GOTERM_BP_FAT	GO:0000087~M phase of mitotic cell cycle	43	3.02391	7.9462e-47	809850, 820324, 810085, 803990, 809559, 819748, 775002, 812018, 778615, 815649, 797714, 826285, 801471, 773124, 819439, 779098, 793059, 815142, 811704, 799856, 789965, 783593, 809693, 777240, 824974, 800860, 789909, 789361, 817790, 798571, 791562, 784402, 787104, 782105, 800610, 802732, 803455, 816657, 813528, 821580, 818768, 802146, 807581	112	224	13528	23.1865	5.4352e-44	7.76457e-45	1.19463e-43
GOTERM_BP_FAT	GO:0048285~organelle fission	43	3.02391	2.15357e-46	809850, 820324, 810085, 803990, 809559, 819748, 775002, 812018, 778615, 815649, 797714, 826285, 801471, 773124, 819439, 779098, 793059, 815142, 811704, 799856, 789965, 783593, 809693, 777240, 824974, 800860, 789909, 789361, 817790, 798571, 791562, 784402, 787104, 782105, 800610, 802732, 803455, 816657, 813528, 821580, 818768, 802146, 807581	112	229	13528	22.6803	1.47304e-43	1.8413e-44	3.23766e-43
GOTERM_BP_FAT	GO:0051301~cell division	42	2.95359	5.0795e-40	809850, 820324, 810085, 803990, 786961, 809559, 819748, 775002, 812018, 778615, 815649, 797714, 826285, 773124, 819439, 817048, 779098, 793059, 815142, 811704, 789965, 783593, 809693, 777240, 824974, 800860, 789361, 817790, 798571, 791562, 808689, 787104, 800610, 802732, 803455, 813528, 796628, 821580, 818768, 802146, 807581, 801800	112	295	13528	17.1966	3.47438e-37	3.86042e-38	7.63648e-37
GOTERM_BP_FAT	GO:0007059~chromosome segregation	23	1.61744	3.54386e-28	809850, 803990, 789909, 786961, 789361, 776843, 809559, 798571, 815649, 791562, 784402, 808689, 797714, 826285, 773124, 819439, 793059, 821580, 799856, 802146, 789965, 783593, 824595	112	81	13528	34.2972	2.424e-25	2.424e-26	5.32781e-25
GOTERM_BP_FAT	GO:0006259~DNA metabolic process	30	2.1097	4.07399e-17	776843, 793777, 814188, 778911, 778316, 818221, 811587, 813154, 799631, 819439, 772477, 806957, 778428, 781012, 797226, 802343, 810288, 778227, 777982, 817790, 784402, 800610, 776417, 803455, 789814, 819016, 792151, 802123, 823221, 818488	112	506	13528	7.16121	2.78661e-14	2.53328e-15	6.12482e-14
GOTERM_BP_FAT	GO:0000070~mitotic sister chromatid segregation	13	0.914205	5.30095e-17	803990, 789909, 789361, 815649, 791562, 784402, 797714, 826285, 793059, 799856, 802146, 789965, 783593	112	36	13528	43.6171	3.62585e-14	3.02154e-15	7.96942e-14
GOTERM_BP_FAT	GO:0007017~microtubule-based process	23	1.61744	7.75247e-17	810085, 787488, 775002, 812018, 791562, 807700, 782105, 797714, 826285, 813154, 808768, 801471, 776047, 817048, 821580, 773315, 814656, 799856, 802146, 789965, 783593, 801800, 809693	112	253	13528	10.9805	7.59393e-14	5.88418e-15	1.66533e-13
GOTERM_BP_FAT	GO:0000819~sister chromatid segregation	13	0.914205	7.78784e-17	803990, 789909, 789361, 815649, 791562, 784402, 797714, 826285, 793059, 799856, 802146, 789965, 783593	112	37	13528	42.4382	7.59393e-14	5.44009e-15	1.66533e-13
GOTERM_BP_FAT	GO:0051726~regulation of cell cycle	25	1.75809	1.66774e-16	819748, 775002, 778615, 812018, 815649, 807700, 826285, 776047, 817048, 815446, 815142, 789965, 783593, 789909, 817790, 798571, 791562, 802732, 800610, 803455, 796628, 802123, 809433, 814656, 800716	112	331	13528	9.12279	1.51879e-13	1.0103e-14	3.33067e-13
GOTERM_BP_FAT	GO:0000226~microtubule cytoskeleton organization	18	1.26582	3.0136e-15	810085, 775002, 812018, 791562, 782105, 797714, 826285, 808768, 776047, 801471, 817048, 821580, 773315, 814656, 799856, 783593, 801800, 809693	112	147	13528	14.7901	2.05036e-12	1.2812e-13	4.50751e-12
GOTERM_BP_FAT	GO:0051276~chromosome organization	27	1.89873	1.23324e-14	803990, 786961, 776843, 814188, 815649, 797714, 826285, 799631, 798021, 819439, 793059, 784083, 799856, 789965, 783593, 824595, 787888, 824974, 789909, 789361, 791562, 784402, 787065, 808768, 779946, 802123, 802146	112	485	13528	6.72415	8.42926e-12	4.95826e-13	1.85296e-11
GOTERM_BP_FAT	GO:0007051~spindle organization	12	0.843882	5.49551e-14	810085, 776047, 817048, 775002, 821580, 812018, 814656, 783593, 797714, 782105, 801800, 809693	112	45	13528	32.2095	3.75899e-11	2.08833e-12	8.26228e-11
GOTERM_BP_FAT	GO:0006260~DNA replication	18	1.26582	2.25603e-13	778428, 781012, 802343, 776843, 778227, 817790, 814188, 778911, 778316, 784402, 811587, 800610, 803455, 789814, 819016, 792151, 802123, 806957	112	190	13528	11.4429	1.54309e-10	8.1215e-12	3.39162e-10
GOTERM_BP_FAT	GO:0007346~regulation of mitotic cell cycle	16	1.12518	1.53861e-12	789909, 775002, 817790, 812018, 798571, 778615, 815649, 791562, 807700, 802732, 826285, 803455, 815142, 814656, 789965, 783593	112	152	13528	12.7143	1.05244e-09	5.26221e-11	2.31321e-09
GOTERM_BP_FAT	GO:0006974~response to DNA damage stimulus	22	1.54712	2.44531e-12	778428, 776843, 810288, 777982, 793777, 778615, 814188, 778911, 778316, 807700, 818221, 776417, 789814, 799631, 819016, 819439, 802123, 772477, 815142, 823221, 818488, 806957	112	373	13528	7.12409	1.67256e-09	7.96458e-11	3.67619e-09
GOTERM_BP_FAT	GO:0006281~DNA repair	19	1.33615	1.51067e-11	778428, 776843, 810288, 777982, 793777, 814188, 778911, 778316, 818221, 776417, 789814, 799631, 819016, 819439, 802123, 772477, 823221, 818488, 806957	112	284	13528	8.08073	1.0333e-08	4.69681e-10	2.27113e-08
GOTERM_BP_FAT	GO:0000075~cell cycle checkpoint	12	0.843882	1.87469e-10	802732, 803455, 775002, 802123, 798571, 778615, 815142, 815649, 814656, 807700, 789965, 783593	112	91	13528	15.9278	1.28229e-07	5.57516e-09	2.8184e-07
GOTERM_BP_FAT	GO:0007093~mitotic cell cycle checkpoint	9	0.632911	1.81825e-09	802732, 775002, 778615, 815142, 815649, 814656, 807700, 789965, 783593	112	43	13528	25.2807	1.24368e-06	5.182e-08	2.73354e-06
GOTERM_BP_FAT	GO:0010564~regulation of cell cycle process	12	0.843882	2.1791e-09	802732, 826285, 789909, 817790, 809433, 798571, 812018, 791562, 815649, 814656, 807700, 789965	112	114	13528	12.7143	1.4905e-06	5.96201e-08	3.27604e-06
GOTERM_BP_FAT	GO:0048015~phosphoinositide-mediated signaling	11	0.773558	2.42438e-09	778428, 810085, 776843, 817048, 775002, 812018, 814188, 778911, 783593, 797714, 782105	112	88	13528	15.0982	1.65827e-06	6.37797e-08	3.64479e-06
GOTERM_BP_FAT	GO:0033554~cellular response to stress	22	1.54712	5.3598e-09	778428, 776843, 810288, 777982, 793777, 778615, 814188, 778911, 778316, 807700, 818221, 776417, 789814, 799631, 819016, 819439, 802123, 772477, 815142, 823221, 818488, 806957	112	566	13528	4.69485	3.6661e-06	1.35782e-07	8.0579e-06
GOTERM_BP_FAT	GO:0007126~meiosis	11	0.773558	7.02674e-09	776417, 777240, 799631, 798021, 797226, 819016, 817048, 793777, 772477, 791562, 818488	112	98	13528	13.5576	4.80628e-06	1.71653e-07	1.0564e-05
GOTERM_BP_FAT	GO:0051327~M phase of meiotic cell cycle	11	0.773558	7.02674e-09	776417, 777240, 799631, 798021, 797226, 819016, 817048, 793777, 772477, 791562, 818488	112	98	13528	13.5576	4.80628e-06	1.71653e-07	1.0564e-05
GOTERM_BP_FAT	GO:0051321~meiotic cell cycle	11	0.773558	8.56707e-09	776417, 777240, 799631, 798021, 797226, 819016, 817048, 793777, 772477, 791562, 818488	112	100	13528	13.2864	5.85986e-06	2.02065e-07	1.28797e-05
GOTERM_BP_FAT	GO:0051329~interphase of mitotic cell cycle	11	0.773558	1.14391e-08	800610, 803455, 813154, 781012, 789361, 819748, 815446, 817790, 802123, 798571, 807700	112	103	13528	12.8994	7.82434e-06	2.60812e-07	1.71975e-05
GOTERM_BP_FAT	GO:0051325~interphase	11	0.773558	1.51326e-08	800610, 803455, 813154, 781012, 789361, 819748, 815446, 817790, 802123, 798571, 807700	112	106	13528	12.5344	1.03506e-05	3.33893e-07	2.27502e-05
GOTERM_BP_FAT	GO:0007010~cytoskeleton organization	18	1.26582	9.00786e-08	810085, 775002, 812018, 791562, 782105, 797714, 826285, 808768, 776047, 801471, 817048, 821580, 773315, 814656, 799856, 783593, 801800, 809693	112	436	13528	4.98657	6.16119e-05	1.92543e-06	0.000135424
GOTERM_BP_FAT	GO:0051783~regulation of nuclear division	8	0.562588	3.44559e-07	802732, 826285, 789909, 817790, 791562, 815649, 814656, 789965	112	56	13528	17.2551	0.000235651	7.14174e-06	0.000518006
GOTERM_BP_FAT	GO:0007088~regulation of mitosis	8	0.562588	3.44559e-07	802732, 826285, 789909, 817790, 791562, 815649, 814656, 789965	112	56	13528	17.2551	0.000235651	7.14174e-06	0.000518006
GOTERM_BP_FAT	GO:0006323~DNA packaging	10	0.703235	4.79506e-07	826285, 803990, 808768, 789361, 776843, 793059, 784083, 814188, 787888, 824595	112	117	13528	10.3236	0.000327928	9.64648e-06	0.000720883
GOTERM_BP_FAT	GO:0051640~organelle localization	9	0.632911	8.36976e-07	826285, 808768, 789909, 776047, 789361, 798571, 799856, 789965, 797714	112	92	13528	11.816	0.000572328	1.63568e-05	0.0012583
GOTERM_BP_FAT	GO:0051656~establishment of organelle localization	8	0.562588	1.46852e-06	826285, 808768, 789909, 789361, 798571, 799856, 789965, 797714	112	69	13528	14.0041	0.00100397	2.79016e-05	0.00220775
GOTERM_BP_FAT	GO:0033043~regulation of organelle organization	12	0.843882	1.6316e-06	802732, 826285, 809850, 789909, 773124, 817790, 809433, 773315, 791562, 815649, 814656, 789965	112	217	13528	6.67939	0.0011154	3.01622e-05	0.00245292
GOTERM_BP_FAT	GO:0031577~spindle checkpoint	5	0.351617	2.02015e-06	802732, 798571, 815649, 814656, 789965	112	12	13528	50.3274	0.00138083	3.63621e-05	0.00303704
GOTERM_BP_FAT	GO:0006310~DNA recombination	9	0.632911	2.29559e-06	776417, 799631, 797226, 819016, 810288, 793777, 777982, 802123, 772477	112	105	13528	10.3531	0.00156896	4.02604e-05	0.00345112
GOTERM_BP_FAT	GO:0000079~regulation of cyclin-dependent protein kinase activity	7	0.492264	4.9941e-06	800610, 803455, 815446, 817048, 817790, 802123, 796628	112	54	13528	15.6574	0.00341015	8.53957e-05	0.00750784
GOTERM_BP_FAT	GO:0050000~chromosome localization	5	0.351617	5.46581e-06	789909, 789361, 798571, 799856, 789965	112	15	13528	40.2619	0.00373164	9.11818e-05	0.00821695
GOTERM_BP_FAT	GO:0007052~mitotic spindle organization	5	0.351617	5.46581e-06	821580, 814656, 797714, 801800, 809693	112	15	13528	40.2619	0.00373164	9.11818e-05	0.00821695
GOTERM_BP_FAT	GO:0051303~establishment of chromosome localization	5	0.351617	5.46581e-06	789909, 789361, 798571, 799856, 789965	112	15	13528	40.2619	0.00373164	9.11818e-05	0.00821695
GOTERM_BP_FAT	GO:0000724~double-strand break repair via homologous recombination	5	0.351617	1.51323e-05	799631, 819016, 810288, 793777, 802123	112	19	13528	31.7857	0.0102972	0.000246411	0.0227473
GOTERM_BP_FAT	GO:0000725~recombinational repair	5	0.351617	1.51323e-05	799631, 819016, 810288, 793777, 802123	112	19	13528	31.7857	0.0102972	0.000246411	0.0227473
GOTERM_BP_FAT	GO:0019932~second-messenger-mediated signaling	11	0.773558	2.29746e-05	778428, 810085, 776843, 817048, 775002, 812018, 814188, 778911, 783593, 797714, 782105	112	235	13528	5.6538	0.015592	0.000365394	0.0345343
GOTERM_BP_FAT	GO:0051439~regulation of ubiquitin-protein ligase activity during mitotic cell cycle	7	0.492264	2.47344e-05	777240, 800860, 819748, 775002, 812018, 815142, 815649	112	71	13528	11.9085	0.0167762	0.000384438	0.0371791
GOTERM_BP_FAT	GO:0030071~regulation of mitotic metaphase/anaphase transition	5	0.351617	2.80213e-05	802732, 789909, 815649, 814656, 789965	112	22	13528	27.4513	0.0189844	0.00042584	0.0421188
GOTERM_BP_FAT	GO:0051438~regulation of ubiquitin-protein ligase activity	7	0.492264	4.23443e-05	777240, 800860, 819748, 775002, 812018, 815142, 815649	112	78	13528	10.8397	0.0285487	0.000629457	0.0636413
GOTERM_BP_FAT	GO:0030261~chromosome condensation	5	0.351617	4.75472e-05	826285, 803990, 789361, 776843, 793059	112	25	13528	24.1571	0.0319999	0.000691741	0.0714584
GOTERM_BP_FAT	GO:0032886~regulation of microtubule-based process	6	0.421941	4.85897e-05	809850, 776047, 773124, 809433, 773315, 789965	112	49	13528	14.7901	0.0326899	0.000692181	0.0730246
GOTERM_BP_FAT	GO:0051340~regulation of ligase activity	7	0.492264	5.24486e-05	777240, 800860, 819748, 775002, 812018, 815142, 815649	112	81	13528	10.4383	0.0352399	0.000731891	0.0788218
GOTERM_BP_FAT	GO:0045841~negative regulation of mitotic metaphase/anaphase transition	4	0.281294	8.45623e-05	802732, 815649, 814656, 789965	112	11	13528	43.9221	0.0562019	0.00115619	0.127055
GOTERM_BP_FAT	GO:0007094~mitotic cell cycle spindle assembly checkpoint	4	0.281294	8.45623e-05	802732, 815649, 814656, 789965	112	11	13528	43.9221	0.0562019	0.00115619	0.127055
GOTERM_BP_FAT	GO:0006261~DNA-dependent DNA replication	6	0.421941	0.000110112	789814, 819016, 802123, 814188, 778911, 806957	112	58	13528	12.4951	0.0725538	0.00147578	0.165413
GOTERM_BP_FAT	GO:0051784~negative regulation of nuclear division	4	0.281294	0.000112076	802732, 815649, 814656, 789965	112	12	13528	40.2619	0.0737995	0.00147323	0.168362
GOTERM_BP_FAT	GO:0045839~negative regulation of mitosis	4	0.281294	0.000112076	802732, 815649, 814656, 789965	112	12	13528	40.2619	0.0737995	0.00147323	0.168362
GOTERM_BP_FAT	GO:0007076~mitotic chromosome condensation	4	0.281294	0.000144829	826285, 803990, 789361, 793059	112	13	13528	37.1648	0.0943211	0.00186751	0.217514
GOTERM_BP_FAT	GO:0006302~double-strand break repair	6	0.421941	0.000151508	799631, 819016, 810288, 793777, 802123, 772477	112	62	13528	11.6889	0.0984499	0.00191741	0.227535
GOTERM_BP_FAT	GO:0031396~regulation of protein ubiquitination	7	0.492264	0.000169843	777240, 800860, 819748, 775002, 812018, 815142, 815649	112	100	13528	8.455	0.109687	0.00211018	0.255036
GOTERM_BP_FAT	GO:0031145~anaphase-promoting complex-dependent proteasomal ubiquitin-dependent protein catabolic process	6	0.421941	0.000189656	800860, 819748, 775002, 812018, 815142, 815649	112	65	13528	11.1495	0.121674	0.00231405	0.284749
GOTERM_BP_FAT	GO:0008283~cell proliferation	13	0.914205	0.000237569	778428, 777240, 789909, 778227, 817790, 775002, 809353, 802732, 800610, 776047, 801471, 817048, 796628	112	436	13528	3.60141	0.149998	0.00284711	0.356565
GOTERM_BP_FAT	GO:0000910~cytokinesis	5	0.351617	0.00034408	777240, 826285, 798571, 807581, 801800	112	41	13528	14.73	0.209738	0.00405024	0.51604
GOTERM_BP_FAT	GO:0051052~regulation of DNA metabolic process	7	0.492264	0.000346347	778428, 803455, 813154, 819016, 802123, 806957, 800716	112	114	13528	7.41667	0.210963	0.00400792	0.519433
GOTERM_BP_FAT	GO:0070507~regulation of microtubule cytoskeleton organization	5	0.351617	0.00037791	809850, 773124, 809433, 773315, 789965	112	42	13528	14.3793	0.227821	0.00429972	0.566644
GOTERM_BP_FAT	GO:0043933~macromolecular complex subunit organization	16	1.12518	0.000674828	786961, 802343, 814188, 776169, 808768, 801471, 819016, 825479, 784083, 802123, 822866, 799856, 789965, 818488, 824595, 787888	112	710	13528	2.72193	0.369813	0.0075409	1.00974
GOTERM_BP_FAT	GO:0031570~DNA integrity checkpoint	5	0.351617	0.000858312	803455, 802123, 778615, 815142, 807700	112	52	13528	11.614	0.444195	0.00942846	1.28264
GOTERM_BP_FAT	GO:0065004~protein-DNA complex assembly	6	0.421941	0.000902025	808768, 784083, 814188, 789965, 787888, 824595	112	91	13528	7.96389	0.460582	0.00975	1.34755
GOTERM_BP_FAT	GO:0010948~negative regulation of cell cycle process	4	0.281294	0.00108413	802732, 815649, 814656, 789965	112	25	13528	19.3257	0.523815	0.011526	1.61754
GOTERM_BP_FAT	GO:0006284~base-excision repair	4	0.281294	0.0013624	778428, 814188, 818221, 806957	112	27	13528	17.8942	0.606438	0.014244	2.02875
GOTERM_BP_FAT	GO:0051319~G2 phase	3	0.21097	0.00136401	813154, 802123, 807700	112	7	13528	51.7653	0.606871	0.0140462	2.03113
GOTERM_BP_FAT	GO:0000085~G2 phase of mitotic cell cycle	3	0.21097	0.00136401	813154, 802123, 807700	112	7	13528	51.7653	0.606871	0.0140462	2.03113
GOTERM_BP_FAT	GO:0010498~proteasomal protein catabolic process	6	0.421941	0.00150458	800860, 819748, 775002, 812018, 815142, 815649	112	102	13528	7.10504	0.642959	0.0152542	2.23825
GOTERM_BP_FAT	GO:0043161~proteasomal ubiquitin-dependent protein catabolic process	6	0.421941	0.00150458	800860, 819748, 775002, 812018, 815142, 815649	112	102	13528	7.10504	0.642959	0.0152542	2.23825
GOTERM_BP_FAT	GO:0006275~regulation of DNA replication	5	0.351617	0.00166099	778428, 803455, 802123, 806957, 800716	112	62	13528	9.74078	0.67924	0.0165825	2.46823
GOTERM_BP_FAT	GO:0040001~establishment of mitotic spindle localization	3	0.21097	0.00180894	826285, 808768, 797714	112	8	13528	45.2946	0.710162	0.0177882	2.6853
GOTERM_BP_FAT	GO:0007080~mitotic metaphase plate congression	3	0.21097	0.00231333	789361, 799856, 789965	112	9	13528	40.2619	0.794878	0.0223766	3.42195
GOTERM_BP_FAT	GO:0051437~positive regulation of ubiquitin-protein ligase activity during mitotic cell cycle	5	0.351617	0.00233537	777240, 800860, 819748, 812018, 815142	112	68	13528	8.8813	0.797955	0.022273	3.45403
GOTERM_BP_FAT	GO:0007018~microtubule-based movement	6	0.421941	0.00236164	787488, 801471, 799856, 789965, 802146, 809693	112	113	13528	6.4134	0.80156	0.0222117	3.49223
GOTERM_BP_FAT	GO:0051443~positive regulation of ubiquitin-protein ligase activity	5	0.351617	0.00259662	777240, 800860, 819748, 812018, 815142	112	70	13528	8.62755	0.831092	0.0240673	3.83341
GOTERM_BP_FAT	GO:0034621~cellular macromolecular complex subunit organization	10	0.703235	0.00266744	808768, 801471, 786961, 784083, 814188, 776169, 799856, 789965, 787888, 824595	112	357	13528	3.38335	0.8391	0.0243865	3.93602
GOTERM_BP_FAT	GO:0051653~spindle localization	3	0.21097	0.00287619	826285, 808768, 797714	112	10	13528	36.2357	0.860564	0.0259267	4.23786
GOTERM_BP_FAT	GO:0051293~establishment of spindle localization	3	0.21097	0.00287619	826285, 808768, 797714	112	10	13528	36.2357	0.860564	0.0259267	4.23786
GOTERM_BP_FAT	GO:0051351~positive regulation of ligase activity	5	0.351617	0.00302509	777240, 800860, 819748, 812018, 815142	112	73	13528	8.27299	0.874104	0.0268987	4.45262
GOTERM_BP_FAT	GO:0051310~metaphase plate congression	3	0.21097	0.00349656	789361, 799856, 789965	112	11	13528	32.9416	0.908903	0.0306357	5.12966
GOTERM_BP_FAT	GO:0006333~chromatin assembly or disassembly	6	0.421941	0.00390834	808768, 798021, 784083, 814188, 787888, 824595	112	127	13528	5.70641	0.931337	0.0337573	5.71733
GOTERM_BP_FAT	GO:0045786~negative regulation of cell cycle	5	0.351617	0.00439861	802732, 815649, 814656, 789965, 800716	112	81	13528	7.45591	0.950968	0.0374489	6.41259
GOTERM_BP_FAT	GO:0010638~positive regulation of organelle organization	5	0.351617	0.00479806	826285, 789909, 809433, 773315, 789965	112	83	13528	7.27625	0.962738	0.0402881	6.9755
GOTERM_BP_FAT	GO:0031572~G2/M transition DNA damage checkpoint	3	0.21097	0.00490593	802123, 778615, 815142	112	13	13528	27.8736	0.9654	0.0406792	7.12697
GOTERM_BP_FAT	GO:0006334~nucleosome assembly	5	0.351617	0.00500663	808768, 784083, 814188, 787888, 824595	112	84	13528	7.18963	0.967714	0.0410032	7.26817
GOTERM_BP_FAT	GO:0031398~positive regulation of protein ubiquitination	5	0.351617	0.00500663	777240, 800860, 819748, 812018, 815142	112	84	13528	7.18963	0.967714	0.0410032	7.26817
GOTERM_BP_FAT	GO:0031497~chromatin assembly	5	0.351617	0.00566867	808768, 784083, 814188, 787888, 824595	112	87	13528	6.94171	0.979522	0.0457678	8.19147
GOTERM_BP_FAT	GO:0000077~DNA damage checkpoint	4	0.281294	0.00711214	802123, 778615, 815142, 807700	112	48	13528	10.0655	0.992419	0.0564634	10.1749
GOTERM_BP_FAT	GO:0034728~nucleosome organization	5	0.351617	0.00716293	808768, 784083, 814188, 787888, 824595	112	93	13528	6.49386	0.99268	0.0562066	10.2439
GOTERM_BP_FAT	GO:0031576~G2/M transition checkpoint	3	0.21097	0.00742749	802123, 778615, 815142	112	16	13528	22.6473	0.993899	0.0575712	10.6028
GOTERM_BP_FAT	GO:0065003~macromolecular complex assembly	13	0.914205	0.00830273	802343, 814188, 776169, 808768, 819016, 825479, 784083, 802123, 822866, 789965, 818488, 824595, 787888	112	665	13528	2.36122	0.996663	0.063447	11.7806
GOTERM_BP_FAT	GO:0006297~nucleotide-excision repair, DNA gap filling	3	0.21097	0.008373	778428, 789814, 778911	112	17	13528	21.3151	0.996821	0.0632651	11.8746
GOTERM_BP_FAT	GO:0006289~nucleotide-excision repair	4	0.281294	0.0103512	778428, 789814, 778911, 818221	112	55	13528	8.78442	0.999189	0.0768535	14.4808
GOTERM_BP_FAT	GO:0031399~regulation of protein modification process	8	0.562588	0.0107923	777240, 800860, 819748, 775002, 812018, 815142, 815649, 814656	112	295	13528	3.27554	0.999402	0.0791584	15.0521
GOTERM_BP_FAT	GO:0000082~G1/S transition of mitotic cell cycle	4	0.281294	0.0108728	800610, 781012, 789361, 815446	112	56	13528	8.62755	0.999434	0.0788872	15.156
GOTERM_BP_FAT	GO:0045787~positive regulation of cell cycle	4	0.281294	0.0114094	826285, 789909, 798571, 789965	112	57	13528	8.47619	0.99961	0.0817763	15.8454
GOTERM_BP_FAT	GO:0007140~male meiosis	3	0.21097	0.0126561	798021, 772477, 818488	112	21	13528	17.2551	0.999835	0.0894238	17.4268
GOTERM_BP_FAT	GO:0051436~negative regulation of ubiquitin-protein ligase activity during mitotic cell cycle	4	0.281294	0.0162494	800860, 775002, 812018, 815649	112	65	13528	7.43297	0.999986	0.11238	21.8311
GOTERM_BP_FAT	GO:0007079~mitotic chromosome movement towards spindle pole	2	0.140647	0.0163437	789909, 789965	112	2	13528	120.786	0.999987	0.111879	21.9437
GOTERM_BP_FAT	GO:0051444~negative regulation of ubiquitin-protein ligase activity	4	0.281294	0.0176131	800860, 775002, 812018, 815649	112	67	13528	7.21109	0.999995	0.118924	23.4445
GOTERM_BP_FAT	GO:0051352~negative regulation of ligase activity	4	0.281294	0.0176131	800860, 775002, 812018, 815649	112	67	13528	7.21109	0.999995	0.118924	23.4445
GOTERM_BP_FAT	GO:0045840~positive regulation of mitosis	3	0.21097	0.0176997	826285, 789909, 789965	112	25	13528	14.4943	0.999995	0.118322	23.5458
GOTERM_BP_FAT	GO:0051785~positive regulation of nuclear division	3	0.21097	0.0176997	826285, 789909, 789965	112	25	13528	14.4943	0.999995	0.118322	23.5458
GOTERM_BP_FAT	GO:0031401~positive regulation of protein modification process	6	0.421941	0.0189008	777240, 800860, 819748, 812018, 815142, 814656	112	187	13528	3.87548	0.999998	0.124694	24.9393
GOTERM_BP_FAT	GO:0006468~protein amino acid phosphorylation	12	0.843882	0.0209083	802732, 777240, 816657, 779946, 807679, 809433, 791562, 815142, 814656, 826097, 807581, 782105	112	667	13528	2.17306	0.999999	0.135833	27.2155
GOTERM_BP_FAT	GO:0008156~negative regulation of DNA replication	3	0.21097	0.0219495	803455, 802123, 800716	112	28	13528	12.9413	1	0.140846	28.3704
GOTERM_BP_FAT	GO:0031397~negative regulation of protein ubiquitination	4	0.281294	0.0228758	800860, 775002, 812018, 815649	112	74	13528	6.52896	1	0.145057	29.3836
GOTERM_BP_FAT	GO:0045859~regulation of protein kinase activity	8	0.562588	0.0234546	800610, 803455, 815446, 817048, 817790, 802123, 796628, 789965	112	345	13528	2.80083	1	0.147138	30.0099
GOTERM_BP_FAT	GO:0051305~chromosome movement towards spindle pole	2	0.140647	0.024416	789909, 789965	112	3	13528	80.5238	1	0.151388	31.0386
GOTERM_BP_FAT	GO:0045842~positive regulation of mitotic metaphase/anaphase transition	2	0.140647	0.024416	789909, 789965	112	3	13528	80.5238	1	0.151388	31.0386
GOTERM_BP_FAT	GO:0051493~regulation of cytoskeleton organization	5	0.351617	0.0256322	809850, 773124, 809433, 773315, 789965	112	136	13528	4.44065	1	0.156992	32.3199
GOTERM_BP_FAT	GO:0031110~regulation of microtubule polymerization or depolymerization	3	0.21097	0.0265758	809850, 773124, 773315	112	31	13528	11.6889	1	0.160933	33.2986
GOTERM_BP_FAT	GO:0007242~intracellular signaling cascade	18	1.26582	0.0269197	778428, 810085, 776843, 775002, 778615, 812018, 814188, 777009, 778911, 807700, 782105, 797714, 779946, 817048, 802123, 815142, 826653, 783593	112	1256	13528	1.73101	1	0.161457	33.652
GOTERM_BP_FAT	GO:0043549~regulation of kinase activity	8	0.562588	0.0275912	800610, 803455, 815446, 817048, 817790, 802123, 796628, 789965	112	357	13528	2.70668	1	0.163774	34.337
GOTERM_BP_FAT	GO:0006793~phosphorus metabolic process	15	1.05485	0.0278479	777240, 817790, 791562, 782105, 802732, 800610, 816657, 815446, 779946, 807679, 809433, 815142, 814656, 826097, 807581	112	973	13528	1.86206	1	0.163788	34.5971
GOTERM_BP_FAT	GO:0006796~phosphate metabolic process	15	1.05485	0.0278479	777240, 817790, 791562, 782105, 802732, 800610, 816657, 815446, 779946, 807679, 809433, 815142, 814656, 826097, 807581	112	973	13528	1.86206	1	0.163788	34.5971
GOTERM_BP_FAT	GO:0042770~DNA damage response, signal transduction	4	0.281294	0.0279944	802123, 778615, 815142, 807700	112	80	13528	6.03929	1	0.163206	34.7451
GOTERM_BP_FAT	GO:0010639~negative regulation of organelle organization	4	0.281294	0.029825	802732, 815649, 814656, 789965	112	82	13528	5.89199	1	0.171616	36.5685
GOTERM_BP_FAT	GO:0051383~kinetochore organization	2	0.140647	0.0324226	786961, 789965	112	4	13528	60.3929	1	0.183807	39.0744
GOTERM_BP_FAT	GO:0031536~positive regulation of exit from mitosis	2	0.140647	0.0324226	798571, 812018	112	4	13528	60.3929	1	0.183807	39.0744
GOTERM_BP_FAT	GO:0051261~protein depolymerization	2	0.140647	0.0324226	801471, 799856	112	4	13528	60.3929	1	0.183807	39.0744
GOTERM_BP_FAT	GO:0007095~mitotic cell cycle G2/M transition DNA damage checkpoint	2	0.140647	0.0324226	778615, 815142	112	4	13528	60.3929	1	0.183807	39.0744
GOTERM_BP_FAT	GO:0007019~microtubule depolymerization	2	0.140647	0.0324226	801471, 799856	112	4	13528	60.3929	1	0.183807	39.0744
GOTERM_BP_FAT	GO:0009186~deoxyribonucleoside diphosphate metabolic process	2	0.140647	0.0324226	802343, 809353	112	4	13528	60.3929	1	0.183807	39.0744
GOTERM_BP_FAT	GO:0051299~centrosome separation	2	0.140647	0.0324226	791562, 809693	112	4	13528	60.3929	1	0.183807	39.0744
GOTERM_BP_FAT	GO:0051338~regulation of transferase activity	8	0.562588	0.0334292	800610, 803455, 815446, 817048, 817790, 802123, 796628, 789965	112	372	13528	2.59754	1	0.187507	40.0204
GOTERM_BP_FAT	GO:0006325~chromatin organization	8	0.562588	0.0359799	787065, 808768, 798021, 779946, 784083, 814188, 787888, 824595	112	378	13528	2.55631	1	0.198928	42.3564
GOTERM_BP_FAT	GO:0042325~regulation of phosphorylation	9	0.632911	0.0378077	800610, 803455, 815446, 817048, 817790, 802123, 796628, 814656, 789965	112	466	13528	2.33277	1	0.206456	43.9778
GOTERM_BP_FAT	GO:0006271~DNA strand elongation during DNA replication	2	0.140647	0.0403641	778911, 806957	112	5	13528	48.3143	1	0.217341	46.1743
GOTERM_BP_FAT	GO:0000089~mitotic metaphase	2	0.140647	0.0403641	824974, 789965	112	5	13528	48.3143	1	0.217341	46.1743
GOTERM_BP_FAT	GO:0051053~negative regulation of DNA metabolic process	3	0.21097	0.0405997	803455, 802123, 800716	112	39	13528	9.29121	1	0.216821	46.3726
GOTERM_BP_FAT	GO:0032270~positive regulation of cellular protein metabolic process	6	0.421941	0.0428582	777240, 800860, 819748, 812018, 815142, 814656	112	233	13528	3.11036	1	0.225922	48.2394
GOTERM_BP_FAT	GO:0051174~regulation of phosphorus metabolic process	9	0.632911	0.0460029	800610, 803455, 815446, 817048, 817790, 802123, 796628, 814656, 789965	112	485	13528	2.24138	1	0.238899	50.738
GOTERM_BP_FAT	GO:0019220~regulation of phosphate metabolic process	9	0.632911	0.0460029	800610, 803455, 815446, 817048, 817790, 802123, 796628, 814656, 789965	112	485	13528	2.24138	1	0.238899	50.738
GOTERM_BP_FAT	GO:0007127~meiosis I	3	0.21097	0.0464365	819016, 817048, 772477	112	42	13528	8.62755	1	0.239142	51.0736
GOTERM_BP_FAT	GO:0034622~cellular macromolecular complex assembly	7	0.492264	0.0468983	808768, 784083, 814188, 776169, 789965, 787888, 824595	112	318	13528	2.65881	1	0.23951	51.4286
GOTERM_BP_FAT	GO:0010604~positive regulation of macromolecule metabolic process	13	0.914205	0.0481969	777240, 800860, 819748, 812018, 778615, 814188, 782969, 819016, 802123, 773315, 815142, 814656, 806957	112	857	13528	1.83222	1	0.243639	52.414
GOTERM_BP_FAT	GO:0051294~establishment of spindle orientation	2	0.140647	0.0482411	808768, 797714	112	6	13528	40.2619	1	0.242103	52.4472
GOTERM_BP_FAT	GO:0007089~traversing start control point of mitotic cell cycle	2	0.140647	0.0482411	803455, 817790	112	6	13528	40.2619	1	0.242103	52.4472
GOTERM_BP_FAT	GO:0000132~establishment of mitotic spindle orientation	2	0.140647	0.0482411	808768, 797714	112	6	13528	40.2619	1	0.242103	52.4472
GOTERM_BP_FAT	GO:0051983~regulation of chromosome segregation	2	0.140647	0.0482411	801471, 789965	112	6	13528	40.2619	1	0.242103	52.4472
GOTERM_BP_FAT	GO:0022616~DNA strand elongation	2	0.140647	0.0482411	778911, 806957	112	6	13528	40.2619	1	0.242103	52.4472
GOTERM_BP_FAT	GO:0034508~centromere complex assembly	2	0.140647	0.0482411	789965, 824595	112	6	13528	40.2619	1	0.242103	52.4472
GOTERM_BP_FAT	GO:0006511~ubiquitin-dependent protein catabolic process	6	0.421941	0.0490219	800860, 819748, 775002, 812018, 815142, 815649	112	242	13528	2.99469	1	0.243852	53.0304
GOTERM_BP_FAT	GO:0051247~positive regulation of protein metabolic process	6	0.421941	0.0497375	777240, 800860, 819748, 812018, 815142, 814656	112	243	13528	2.98236	1	0.245286	53.559
